# The Presence of the Temporal Horn Exacerbates the Vulnerability of Hippocampus during Head Impacts

## Authors

Zhou Zhou,<sup>1,2†\*</sup> Xiaogai Li,<sup>2†</sup> August G Domel,<sup>1</sup> Emily L Dennis,<sup>3,4</sup> Marios Georgiadis,<sup>4</sup> Yuzhe Liu,<sup>1</sup> Samuel J. Raymond,<sup>1</sup> Gerald Grant,<sup>4,5</sup> Svein Kleiven,<sup>2‡</sup> David Camarillo,<sup>1,5,7‡</sup> Michael Zeineh<sup>4‡\*</sup>

## Affiliations

<sup>1</sup> Department of Bioengineering, Stanford University, Stanford, CA, 94305, USA.

<sup>2</sup> Neuronic Engineering, KTH Royal Institute of Technology, Stockholm, 14152, Sweden.

<sup>3</sup> TBI and Concussion Center, Department of Neurology, University of Utah, Salt Lake City, 84108, USA

<sup>4</sup> Department of Radiology, Stanford University, Stanford, CA, 94305, USA.

<sup>5</sup> Department of Neurosurgery, Stanford University, Stanford, CA, 94305, USA.

<sup>6</sup> Department of Neurology, Stanford University, Stanford, CA, 94305, USA.

<sup>7</sup> Department of Mechanical Engineering, Stanford University, Stanford, CA, 94305, USA.

\* Corresponding author. Email: [zhouz@stanford.edu](mailto:zhouz@stanford.edu), [mzeineh@stanford.edu](mailto:mzeineh@stanford.edu)

† These authors contributed equally to this work.

‡ These authors share senior authorship.

## Corresponding authors

Zhou Zhou, Department of Bioengineering, Stanford University, Stanford, CA, 94305, USA, Email: [zhouz@stanford.edu](mailto:zhouz@stanford.edu)

Michael Zeineh, Department of Radiology, Stanford University, 213 Quarry Road, Stanford, CA 94305, USA, Email: [mzeineh@stanford.edu](mailto:mzeineh@stanford.edu)

## Other authors

Xiaogai Li, Division of Neuronic Engineering, Royal Institute of Technology (KTH), SE-14152, Huddinge, Sweden, Email: [xiaogai@kth.se](mailto:xiaogai@kth.se)

August G Domel, Department of Bioengineering, Stanford University, Stanford, CA, 94305, USA, Email: [augustdomel@gmail.com](mailto:augustdomel@gmail.com)

Emily L Dennis, TBI and Concussion Center, Department of Neurology, University of Utah, Salt Lake City, 84108, USA, Email: [eldennis@stanford.edu](mailto:eldennis@stanford.edu)

Marios Georgiadis, Department of Radiology, Stanford University, 213 Quarry Road, Stanford, CA 94305, USA, Email: [mariosg@stanford.edu](mailto:mariosg@stanford.edu)

Yuzhe Liu, Department of Bioengineering, Stanford University, Stanford, CA, 94305, USA, Email: [yuzheliu@stanford.edu](mailto:yuzheliu@stanford.edu)

Samuel J. Raymond, Department of Bioengineering, Stanford University, Stanford, CA, 94305, USA, Email: [sjray@stanford.edu](mailto:sjray@stanford.edu)

Gerald Grant, Department of Neurosurgery, Stanford University School of Medicine, 291 Campus Drive, Stanford, CA 94305, Stanford, CA. Email: [ggrant2@stanford.edu](mailto:ggrant2@stanford.edu)

Svein Kleiven, Division of Neuronic Engineering, Royal Institute of Technology (KTH), SE-14152, Huddinge, Sweden, Email: [sveink@kth.se](mailto:sveink@kth.se)

David Camarillo, Department of Bioengineering, Stanford University, 443 Via Ortega, Room 202, Stanford, CA, 94305, Email: [dcamarillo@stanford.edu](mailto:dcamarillo@stanford.edu)

## 45 **Abstract**

46 Hippocampal injury is common in traumatic brain injury (TBI) patients, but the underlying  
47 pathogenesis remains elusive. In this study, we hypothesize that the presence of the adjacent fluid-  
48 containing temporal horn exacerbates the biomechanical vulnerability of the hippocampus. Two  
49 finite element models of the human head were used to investigate this hypothesis, one with and one  
50 without the temporal horn, and both including a detailed hippocampal subfield delineation. A fluid-  
51 structure interaction coupling approach was used to simulate the brain-ventricle interface, in which  
52 the intraventricular cerebrospinal fluid was represented by an arbitrary Lagrangian-Eulerian multi-  
53 material formation to account for its fluid behavior. By comparing the response of these two models  
54 under identical loadings, the model that included the temporal horn predicted increased magnitudes  
55 of strain and strain rate in the hippocampus with respect to its counterpart without the temporal  
56 horn. This specifically affected cornu ammonis (CA) 1 (CA1), CA2/3, hippocampal tail, subiculum,  
57 and the adjacent amygdala and ventral diencephalon. These computational results suggest the  
58 presence of the temporal horn is a predisposing factor for the prevalence of hippocampal injury,  
59 advancing the understanding of hippocampal injury during head impacts. A corresponding analysis  
60 in an imaging cohort of collegiate athletes found that temporal horn size negatively correlates with  
61 hippocampal volume in the same subfields, suggesting a possible real-world correlation whereby a  
62 larger temporal horn may be associated with decreased hippocampal volume. Our biomechanical  
63 and neuroimaging effort collectively highlight the mechanobiological and anatomical  
64 interdependency between the hippocampus and temporal horn.

## 65 **Keywords**

66 Hippocampal injury; temporal horn; brain-ventricle interface; fluid-structure interaction; finite  
67 element analysis; traumatic brain injury

## 68 **Introduction**

69 Traumatic brain injury (TBI) is a critical public health and socio-economic problem. In the  
70 United States, approximately 5.3 million people are living with a TBI-related disability (Langlois  
71 and Sattin, 2005). At a global level, an estimated 69 million people suffer a TBI each year (Dewan  
72 et al., 2018), with yearly costs reaching 400 billion dollars (Maas et al., 2017). Despite worldwide  
73 efforts to reduce the incidence and mitigate the consequence of TBI, improvement of overall  
74 outcome has not been achieved (Roozenbeek et al., 2013), especially for mild TBI (mTBI), also  
75 known as concussion. Epidemiological data showed that concussion rates in high school sports  
76 (Rosenthal et al., 2014) and the military (Cameron et al., 2012) have been rising. The need to  
77 improve concussion outcome is particularly urgent, given that concussion is notoriously  
78 underreported, difficult to screen, and associated with immediate and persistent deficit to memory  
79 and attention with possible chronic neurodegenerative consequences (McKee et al., 2015;Meier et  
80 al., 2015).

81 As a crucial structure for long-term, episodic memory formation and retrieval (Bird and  
82 Burgess, 2008), the hippocampus is often reported to be injured secondary to physical trauma in  
83 humans across different impact severities. In fatal TBI, post-mortem histopathological  
84 examinations identify the hippocampus as one of the most commonly injured regions (73%-87%)  
85 (Kotapka et al., 1992;Kotapka et al., 1993;Kotapka et al., 1994;Maxwell et al., 2003). In mTBI, *in*  
86 *vivo* human imaging analyses demonstrate that repetitive concussive impacts or even sub-  
87 concussive impacts (i.e., high-velocity impacts that do not cause concussion) are associated with  
88 abnormal hippocampal atrophy longitudinally (Parivash et al., 2019) and cross-sectionally (Singh  
89 et al., 2014). The prevalence of hippocampal injury has also been widely noted in animal  
90 experiments (e.g., non-human primates, pigs, rats, sheep, and rabbits) under diverse modes of  
91 mechanical perturbations, including non-impact acceleration (Gennarelli et al., 1982;Kotapka et al.,  
92 1991), impact acceleration (Anderson et al., 2003), weight-drops (Kalish and Whalen, 2016),

93 cortical contusion (Baldwin et al., 1997), and fluid percussion injury (Hicks et al., 1996). The  
94 resultant injury within the hippocampus of experimentally traumatized animals exhibits a broad  
95 spectrum of pathological manifestations, varying from impaired electrophysiological activity  
96 associated with hippocampal circuitry dysfunction (Wolf et al., 2017) to profound neuronal  
97 apoptosis and marked gliosis (Smith et al., 1997).

98 The pathogenetic mechanism of trauma-induced hippocampal injury has long been  
99 attributed to the selective vulnerability of hippocampal neurons to hypoxemia and ischemia  
100 (Pulsinelli, 1985;Ng et al., 1989), typical complications of severe TBI insults (Graham et al.,  
101 1978;Graham et al., 1989). For example, a histopathological study revealed that 27 out of 29  
102 individuals with at least one episode of clinically recorded hypoxia had hippocampal damage  
103 (Kotapka et al., 1992). However, 14 out of 18 patients without documented hypoxemia also had  
104 hippocampal lesions (Kotapka et al., 1992), suggesting that hippocampal injury may be independent  
105 of hypoxia. Another candidate mechanism is pathological neuronal excitation involving glutamate  
106 and/or other excitatory amino acid neurotransmitters, supported by animal experiments where  
107 traumatic insults triggered glutamate concentrations in the extracellular fluid of the hippocampus  
108 (Faden et al., 1989;Runnerstam et al., 2001). Given that the hippocampus is dense in receptors for  
109 glutamate (Kotapka et al., 1991;Leranth et al., 1996), redundant extracellular glutamate could  
110 induce neuronal excitotoxicity, and indeed, pre-treatment of experimentally traumatized animals  
111 with glutamate antagonists attenuates hippocampal lesions (Faden et al., 1989). However, such  
112 antagonists in humans have not proven beneficial, thus, a neuroexcitotoxic mechanism in human  
113 TBI cannot be considered a sole explanation (Parsons et al., 1999). Taken together, trauma-induced  
114 hippocampal lesions in humans cannot be fully explained by the current mechanisms.

115 An alternative line of investigation is biomechanical. Given that previous modeling work  
116 has shown that the presence of fluid can affect the transmission of mechanical forces within the  
117 brain (Zhou et al., 2020a), one structure that may be associated with the hippocampal vulnerability

118 is the temporal horn of the lateral ventricle. The temporal horn is a cavity that forms the roof of the  
119 hippocampus and is filled with cerebrospinal fluid (CSF) and occasionally choroid plexus (Insausti  
120 and Amaral, 2003). Previous studies found that the volumes of the hippocampus and temporal horn  
121 were inversely correlated in TBI patients (Gale et al., 1994;Bigler et al., 1997;Bigler et al., 2002).  
122 This has largely been surmised to be secondary to volume loss, but this oversimplification can miss  
123 a potentially important pathology-induced volumetric interdependency. To date, the biomechanical  
124 effect of the temporal horn on the hippocampus remains unknown.

125 Interrogation of this biomechanical relationship requires modeling to estimate the myriad  
126 variables and forces at play. As computational surrogates of the human head, finite element (FE)  
127 models have been instrumental in exploring the association of regional vulnerabilities with potential  
128 predisposing factors during trauma from the biomechanical perspective (Kleiven, 2007;McAllister  
129 et al., 2012;Mao et al., 2013;Ji et al., 2015;Atsumi et al., 2018;Trotta et al., 2020;Zhou et al., 2021a).  
130 Extending the current models to investigate the relationship between the temporal horn and  
131 hippocampus requires that the FE model possesses an anatomically and mechanically accurate  
132 representation of both structures, and a precise description of the interface between the fluid-filled  
133 temporal horn and neighboring hippocampus. However, in existing finite element models, the  
134 temporal horn was either wholly substituted as brain parenchyma (McAllister et al., 2012;Zhou et  
135 al., 2016) or simulated as a solid structure using the Lagrangian approach (Kleiven, 2007;Mao et  
136 al., 2013;Ji et al., 2015;Atsumi et al., 2018;Trotta et al., 2020;Zhou et al., 2021a). This Lagrangian  
137 approach is a dominant numerical scheme for solid mechanics and is insufficient to computationally  
138 reflect the fact that the temporal horn is filled with CSF with the potential flow within the ventricular  
139 cavity during the impacts (Souli et al., 2000;Zhou, 2019;Zhou et al., 2020b). Approaches to date  
140 may have missed key and relevant properties of the temporal horn that have precluded the  
141 determination of its biomechanical relevance.

142 The primary aim of the current study was to discern whether the presence of the temporal  
143 horn exacerbates the biomechanical vulnerability of the hippocampus. To test this hypothesis, two  
144 models with and without a detailed anatomic description of the temporal horn profiles are  
145 established. By comparing the strain-related responses to identical loadings between the two models,  
146 the biomechanical mechanism for the temporal horn's role in the vulnerability of the hippocampus  
147 was uncovered. In addition, we also analyzed neuroimaging data of male collegiate athletes to  
148 investigate the volumetric interrelationship between the hippocampus and temporal horn.

## 149 **Materials and Methods**

150 In this study, we collectively employed computational modeling and neuroimaging analysis  
151 to discern the biomechanical and volumetric interdependency between the hippocampus and  
152 temporal horn. To achieve that, we utilized a novel, multi-million element 3D head model (Zhou et  
153 al., 2020a) that did not initially incorporate the temporal horn (no-temporal-horn (NTH)-model),  
154 and further extended this model by adding the temporal horn to the lateral ventricle (temporal-horn  
155 (TH)-Model). An arbitrary Lagrangian-Eulerian (ALE) multi-material formation was used to  
156 emulate the fluid behavior of the intraventricular CSF, with its responses being concatenated with  
157 the brain tissue via a fluid-structure interaction (FSI) coupling algorithm. This allows computation  
158 of strain (fractional change in unit length), strain rate (strain change over time), and stress (force  
159 per unit area) in the hippocampus. By comparing the deformation-related responses estimated by  
160 these two models secondary to six concussive/sub-concussive impacts, the mechanical role that the  
161 temporal horn exerted on the hippocampus was revealed. To see if the modeled relationship  
162 between the presence of the temporal horn and associated increased strains/strain rates had an in  
163 vivo correlation, we analyzed data collected from 91 male collegiate athletes to evaluate the  
164 volumetric relationship between the hippocampus and temporal horn.

### 165 **Finite element modeling of human brain**

166 The FE head model without the temporal horn (i.e., the NTH-Model) used in this study was  
167 previously developed at KTH Royal Institute of Technology in Stockholm, Sweden (Zhou et al.,

168 2020a). The model includes the scalp, skull, brain, subarachnoid CSF (i.e., CSF within the  
169 subarachnoid space), meninges (i.e., dura mater and pia mater), falx, tentorium, and cerebral  
170 ventricles (i.e., lateral ventricles without the temporal horn, and third ventricle) (Fig. 1). The whole  
171 head model consists of 4.2 million hexahedral elements and 0.5 million quadrilateral elements, in  
172 which the brain has a total of 2.6 million nodes, and 2.3 million hexahedral elements. The average  
173 brain element size is  $0.59 \pm 0.26$  mm, meeting the requirement that a human brain model with  
174 converged responses should have an average element size less than 1.8 mm (Zhao and Ji, 2019).  
175 Information regarding the geometry profiles and material modeling of various intracranial  
176 components in the NTH-Model was elaborated in a previous study (Zhou et al., 2020a) as well as  
177 in Appendix A.

178 To investigate the potential effect of the presence of the CSF-filled temporal horn on the  
179 hippocampus, we extended the NTH-model by adding the fluid-filled temporal horn to the cerebral  
180 ventricle (i.e., from Fig. 1C to Fig. 1D). This extended model (i.e., the TH-Model) has the same  
181 geometrical features, material properties, element formulation, and interface conditions as the  
182 NTH-Model, except for the newly added temporal horn. The volume ratio between the temporal  
183 horn and the brain in the TH-Model was 0.13%, falling within the range in healthy adults (0.1%-  
184 0.3%) (Bigler and Tate, 2001). Strain response and brain-skull relative motion estimated by the TH-  
185 Model were respectively evaluated by the experiments presented by Hardy et al. (2007) and Zhou  
186 et al. (2019c) in Appendix B. Details about the cerebral ventricle modeling and the brain-ventricle  
187 interface of the TH-Model are elaborated in the following two sections, along with that in the NTH-  
188 Model.

189 To facilitate the derivation of deformation-related metrics in regions of interest (ROIs) from  
190 completed simulations, the brain segmentation was registered to the coordinate system of the FE  
191 head model and then the brain elements were grouped into different sub-regions according to the  
192 spatial correspondence with the brain segmentation via an automated procedure implemented by a

193 custom-built MATLAB script. For both the TH-Model and NTH-Model, the anatomically classified  
 194 brain regions included cerebral cortex, cerebellum, hippocampus with six subfields as segmented  
 195 by FreeSurfer 7 (i.e., cornu ammonis (CA) 1, CA2/3, CA4/dentate gyrus (DG), hippocampus tail  
 196 (HP Tail), subiculum, and presubiculum) (Fig. 1F), and non-hippocampal paraventricular regions  
 197 (i.e., amygdala, ventral diencephalon (ventral DC), pallidum, putamen, caudate, and corpus  
 198 callosum (CC)) (Fig. 1E).

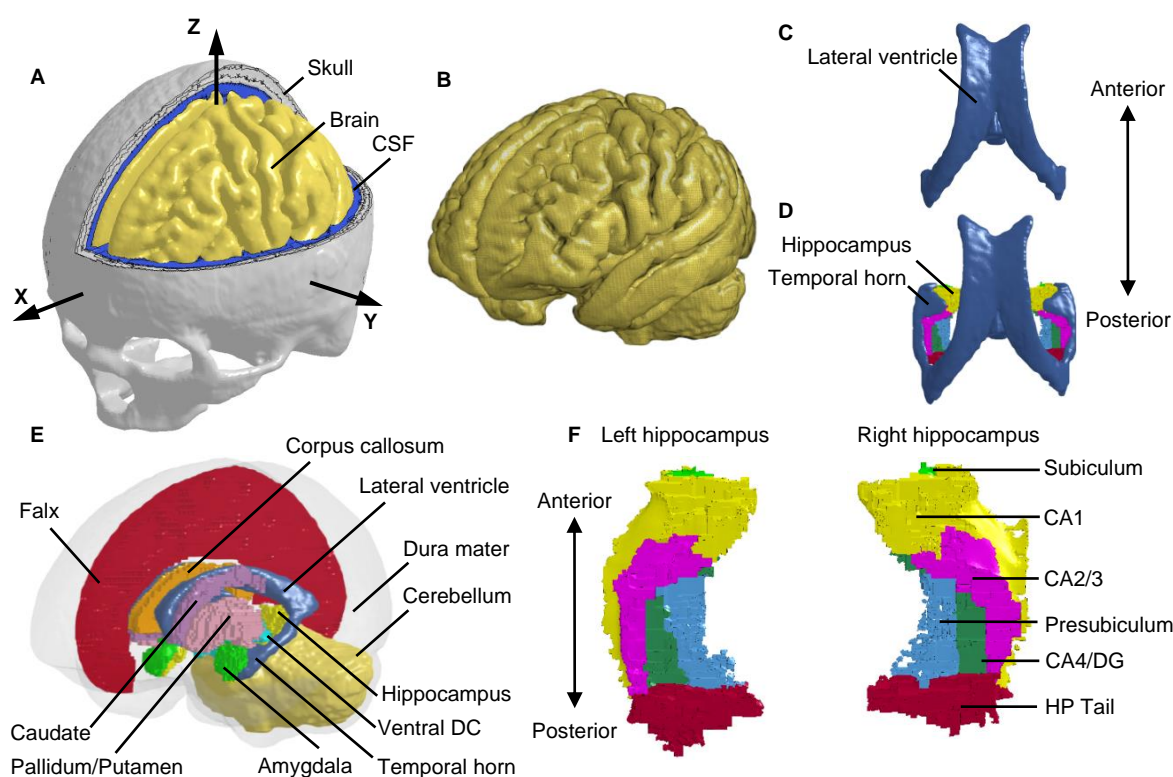

199 **Fig. 1. Finite element models of the human head with and without the temporal horn.** (A)  
 200 Head model with the skull open to expose the subarachnoid CSF and brain. A skull-fixed coordinate  
 201 system and corresponding axes are illustrated with the origin at the center of gravity of the head.  
 202 (B) Brain model with fine mesh. (C) Ventricles (i.e., lateral ventricles without the temporal horn,  
 203 and third ventricle) in the NTH-model. (D) Ventricles (i.e., lateral ventricles with the temporal horn,  
 204 and third ventricle) in the TH-model and hippocampus. (E) Isometric view of deep brain structures,  
 205 cerebral ventricles, falx, and dura mater (in translucency) in the TH-Model. (F) Left and right  
 206 hippocampal formations with subfields. CSF: cerebrospinal fluid; Ventral DC: ventral  
 207 diencephalon; CA: cornu ammonis; DG: dentate gyrus; HP Tail: hippocampal tail.  
 208

## 209 Cerebral ventricle modeling

210 To emulate the fluid properties of the intraventricular CSF and potential CSF flow  
 211 secondary to exterior loading, the cerebral ventricles in the TH-Model (Fig. 2A) and NTH-Model  
 212 (Fig. 2B) were simulated using an ALE multi-material formulation. This formulation advances the



213 solution in time using a two-step operation, in which the material is antecedently deformed in a  
 214 Lagrangian step and subsequently followed by an advection step with the element variables being  
 215 remapped (Zhou et al., 2019b). In the Lagrangian step, the intraventricular CSF deformation was  
 216 determined by the equation of state (for dilatational responses) and constitutive equation (for  
 217 deviatoric responses) listed in Table 1, together with associated formulations and material constants.  
 218 In the advection step, a second-order van Leer scheme was selected, excelling in advection accuracy  
 219 and numerical stability (van Leer, 1979).

220 **Table 1. Material constant for the cerebral ventricles in the TH-Model and NTH-Model.**  $P$  :  
 221 pressure,  $C$  : intercept of  $v_s - v_p$  curves,  $v_s$  : velocity of a shockwave traveling through the  
 222 intermediary material,  $v_p$  : velocity of the shocked material;  $S_1$ ,  $S_2$ , and  $S_3$ : coefficients of the slope  
 223 of the  $v_s - v_p$  curves,  $\gamma_0$  : Gruneisen gamma,  $a$  : first order volume correction to  $\gamma_0$ ;  $\rho_0$  : initial  
 224 density;  $\rho$  : instantaneous density;  $\sigma_{ij}^v$  : deviatoric stress;  $\gamma$  : dynamic viscosity;  $\dot{\epsilon}_{ij}$  : deviatoric  
 225 strain rate;  $PC$  : cut-off pressure.

| Equation of state                                                                                                                                                                                  | $\rho_0$ (kg/m <sup>3</sup> ) | $C$ (m/s)  | $S_1$ | $S_2$ | $S_3$ | $a$ | $\gamma_0$ |
|----------------------------------------------------------------------------------------------------------------------------------------------------------------------------------------------------|-------------------------------|------------|-------|-------|-------|-----|------------|
| $P = \frac{\rho_0 C^2 \mu (1 + (1 - \frac{\gamma^2}{2}) \mu - \frac{a}{2} \mu^2)}{[1 - (S_1 - 1) \mu - S_2 \frac{\mu^2}{\mu + 1} - S_3 \frac{\mu^3}{(\mu + 1)^2}]}; \mu = \frac{\rho}{\rho_0} - 1$ | 1000                          | 1482.9     | 2.10  | -0.17 | 0.01  | 0   | 1.2        |
| Constitutive equation                                                                                                                                                                              | $\gamma$ (Pa.s)               | $PC$ (MPa) |       |       |       |     |            |
| $\sigma_{ij}^v = \gamma \dot{\epsilon}_{ij}$                                                                                                                                                       | 0.001                         | -22        |       |       |       |     |            |

## 226 Brain-ventricle interface modeling

227 To couple the mechanical responses of the ALE-represented intraventricular CSF with the  
 228 Lagrangian-represented brain, a penalty-based FSI coupling scheme (Batterbee et al., 2011; Zhou et  
 229 al., 2019a) was implemented to both the TH-Model and NTH-Model. The implemented coupling  
 230 scheme delivers tension and compression in the radial direction and allows relative motion in the  
 231 tangential direction.

232 Owing to the requirement of implementing the penalty-based coupling scheme, any  
 233 locations to which the fluid may potentially flow during the simulations are required to be meshed.  
 234 Considering that the intraventricular CSF might flow to regions that were originally occupied by  
 235 deep brain structures (due to deformation of the brain itself and the relative motion between the

236 brain and cerebral ventricles during the simulation), additional meshes were generated in these  
237 regions, referred to as the “void mesh” in Fig. 2A and Fig. 2B, and initially overlapped with part of  
238 the brain elements. The void mesh was emulated with the ALE multi-material element approach,  
239 with material properties identical to that of the intraventricular CSF (Table 1) along with an extra  
240 void definition. Such a void definition ensured that no fluid was distributed within the void mesh  
241 under its initial configuration. The motion of the ALE elements followed the mass-weighted  
242 velocity in the ALE mesh (Hallquist, 2007).

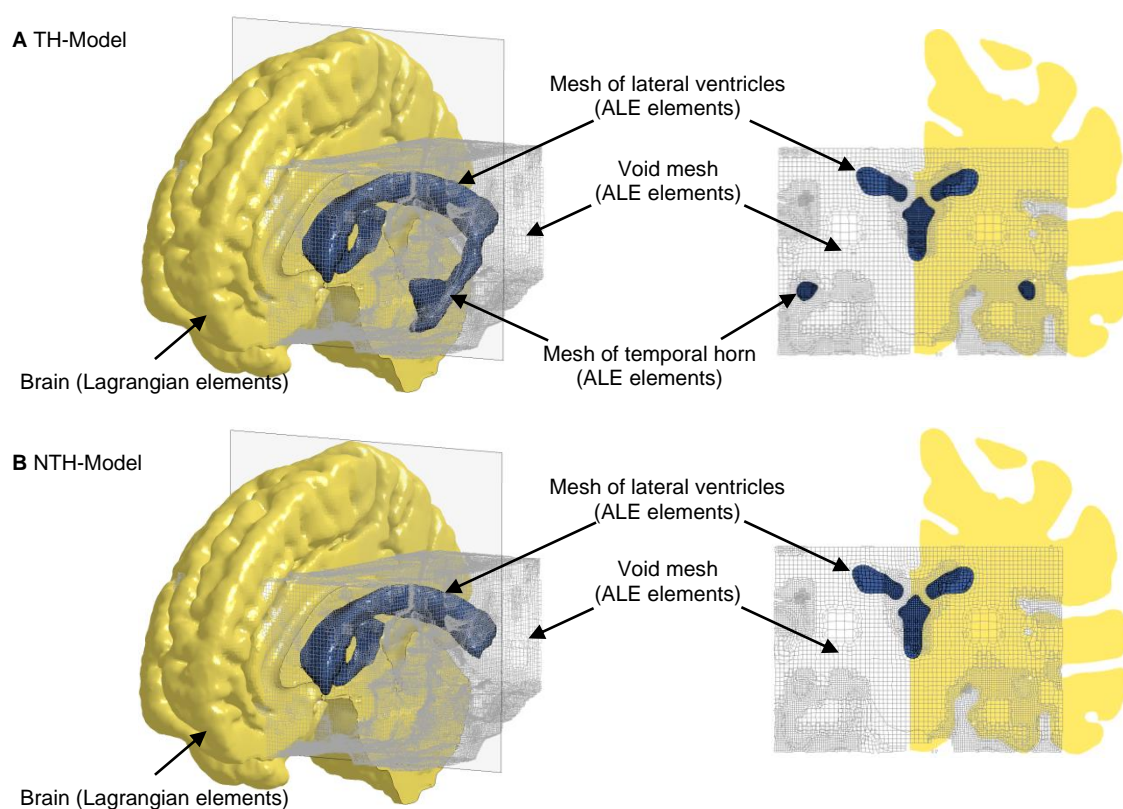

243

244 **Fig 2. Brain-ventricle interfaces of the TH-Model (A) and NTH-Model (B).** For each model, an  
245 isometric view of the brain model, the cerebral ventricle, and void mesh are shown on the left.  
246 Coronal sections at the planes indicated in the left subfigures are shown on the right. For better  
247 illustration, only half of the brain is visible. The cerebral ventricles are shown as blue shaded  
248 elements and the void mesh as wireframe elements. ALE: arbitrary Lagrangian-Eulerian.

## 249 Loading conditions

250 Estimation of hippocampal response was obtained from the TH-Model and NTH-Model by  
251 simulating 6 representative football head impacts (Table 2 and Appendix B). At Stanford University,  
252 instrumented mouthguards have been developed to measure six-degree-of-freedom head kinematics

253 during in-game head impacts to athletes (Liu et al., 2020a;Cecchi et al., 2021). Using these  
 254 instrumented mouthguards, over 500 head impacts in football have been video confirmed  
 255 (Hernandez et al., 2015). In the current study, two concussive impacts, one with the athlete suffering  
 256 alteration of consciousness (Case 1) and the other with the player having a milder but self-reported  
 257 concussion (Case 2), and two sub-concussive impacts (Case 4 and Case 5) were simulated. In  
 258 addition, a helmet-to-helmet collision involving two players was simulated with the struck player  
 259 (Case 3) having a concussion and the striking player not (Case 6). Video recordings of the game  
 260 were analyzed, through which the initial head kinematics were determined and further guided the  
 261 laboratory reconstruction to obtain the dynamic kinematics of this collision (Pellman et al.,  
 262 2003;Sanchez et al., 2019). All simulations were solved by the massively parallel processing  
 263 version of LS-DYNA R11 double precision with 128 processors.

264 **Table 2. Peaks of translational acceleration and rotational acceleration and injury severity of**  
 265 **the 6 cases considered in this study.** The X, Y, and Z axes are the same as those in the skull-fixed  
 266 coordinate system in Fig. 1A. Note that Cases 1-2 and Cases 4-5 are on-field impacts measured by  
 267 the mouthguard (Hernandez et al., 2015), while Case 3 and Case 6 are laboratory-reconstructed  
 268 impacts (Pellman et al., 2003;Sanchez et al., 2019).

| Case ID | Peak translational acceleration (g) |       |       |           | Peak rotational acceleration (krad/s <sup>2</sup> ) |       |       |           | Injury severity |
|---------|-------------------------------------|-------|-------|-----------|-----------------------------------------------------|-------|-------|-----------|-----------------|
|         | X                                   | Y     | Z     | Magnitude | X                                                   | Y     | Z     | Magnitude |                 |
| Case 1  | -40.6                               | 100.4 | -63.4 | 106.1     | 12.89                                               | -3.06 | -3.24 | 12.95     | Concussion      |
| Case 2  | -61.1                               | -57.8 | -45.8 | 84.2      | 4.21                                                | 5.14  | -1.84 | 6.19      | Concussion      |
| Case 3  | -31.9                               | 133.4 | 41.6  | 134.0     | 4.65                                                | 1.20  | -6.81 | 7.50      | Concussion      |
| Case 4  | -49.3                               | -47.2 | -32.3 | 71.9      | 2.44                                                | -4.36 | -7.26 | 7.75      | Sub-concussion  |
| Case 5  | 7.3                                 | 18.1  | 11.4  | 20.4      | 4.12                                                | 0.59  | 1.05  | 4.14      | Sub-concussion  |
| Case 6  | -21.5                               | -59.4 | 57.8  | 78.8      | -5.82                                               | -1.66 | -2.44 | 6.24      | Sub-concussion  |

269 The strain and strain rates in the 6 hippocampal subfields, the whole hippocampus, and 6  
 270 non-hippocampal periventricular regions were extracted from the two models, resulting in a total  
 271 of 13 region-wise comparisons for each injury metric. This was motivated by the findings that  
 272 hippocampal cell death was significantly affected by the strain (Cater et al., 2006) and hippocampal  
 273 functional impairment was dependent on both strain and strain rate (Kang and Morrison, 2015) in  
 274 *in vitro* TBI models on organotypic hippocampal slice cultures from rat. The strain was calculated

275 as the maximum principal value of the Green-Lagrange strain tensor, while the strain rate was  
276 computed as the maximum principal value of rate of deformation tensor (Holzapfel, 2000). To  
277 eliminate potential numerical artifacts, the 95<sup>th</sup> percentile maximum principal strain and the 95<sup>th</sup>  
278 percentile maximum principal strain rate over the simulated time windows were presented for all  
279 ROIs (Panzer et al., 2012; Zhou et al., 2021b).

## 280 **Neuroimaging analysis**

### 281 **Study population and imaging acquisition**

282 We sought to identify if the relationship between the presence of the temporal horn and  
283 associated strains showed an imaging correlation, specifically if there was a volumetric relationship  
284 between the hippocampus and temporal horn. For this, we analyzed data collected from 91 male  
285 collegiate athletes (mean age (standard deviation): 19.3 (1.43) years). This was a new analysis of  
286 previously collected and processed data (Parivash et al., 2019). All procedures were in accordance  
287 with the Institutional Review Board of Stanford University School of Medicine and Health  
288 Insurance Portability and Accountability. The enrolled subjects had no self-reported history of brain  
289 surgery, severe brain injury, or major neurological, psychiatric, or substance abuse disorder. All  
290 brain MRI datasets were scrutinized for abnormalities by a neuroradiologist to further exclude any  
291 clinically evident brain injury.

### 292 **Imaging acquisition**

293 Standard protocols were used to acquire MRIs using a 3T magnetic resonance imaging  
294 (MRI) scanner (GE MR 750, Milwaukee, WI, USA) and an 8-channel-receive head coil. For each  
295 participant, we acquired T<sub>1</sub>-weighted axial images (inversion recovery fast spoiled gradient echo  
296 brain volume imaging, voxel size =  $1 \times 1 \times 1$  mm<sup>3</sup>, repetition time (TR) = 7.9 ms, echo time = 3.1  
297 ms, number of excitations (NEX) = 1, acquisition time = 5.1 min) and high-resolution coronal T<sub>2</sub>-  
298 weighted images, perpendicular to the long axis of the hippocampus (coronal oblique fast spin echo,  
299 voxel size =  $0.29 \times 0.52 \times 2$  mm<sup>3</sup>, 0.2 mm skip, TR= 5000-15000 ms, TE = 95-109 ms, echo train

300 length = 25, matrix =  $512 \times 384$ , NEX=2, 32-40 slices, one to two acquisitions, acquisition time =  
301 4.4-5.8 min).

## 302 **Segmentation**

303 Images were segmented using Automated Segmentation of Hippocampal Subfields (ASHS)  
304 (Contijoch et al., 2015), excelling in performing multi-atlas label fusion and machine-learning  
305 correction to obtain reliable segmentation of the hippocampal subfields and adjacent structures (e.g.,  
306 temporal horn as the ROI in the current study). In ASHS, the hippocampal subfields include CA1,  
307 CA2-4, DG, subiculum, entorhinal cortex (ERC), and perirhinal cortex (PRC). Given that the CA4  
308 and DG are inseparable on individual segmentations and CA2 and CA3 are small in size, subfields  
309 CA2-4 and DG were combined into one subregion, referred to as CA2-4/DG. Similarly, ERC and  
310 PRC were combined into one subregion (ERC/PRC). Automated segmentations for the  
311 hippocampus and temporal horn were manually checked for accuracy by three independent, blinded  
312 raters as previously described (Parivash et al., 2019). Subfield volumes were summed to obtain  
313 total hippocampal volume. To regress out the inter-subject differences in head size (Barnes et al.,  
314 2010), we measured the intracranial volume of all participants using the FreeSurfer software (Fischl,  
315 2012).

## 316 **Statistical analysis**

317 For the computational simulations, percentage differences in the 95<sup>th</sup> percentile maximum  
318 value of strain and strain rate predicted by the TH-Model and NTH-Model were computed at a  
319 region-wise basis, with the value from the NTH-Model as reference. Thus, the 95<sup>th</sup> percentile  
320 maximum values of strain and strain rate estimated by the TH-Model and NTH-Model were  
321 respectively extracted from each loading case for a total of 13 ROIs, including 6 hippocampal  
322 subfields, the whole hippocampus, and 6 non-hippocampal paraventricular regions. To statistically  
323 ascertain the influence of temporal horn on the deformation-related responses, the strain and strain  
324 rate in all 13 ROIs from the TH-Model and NTH-Model were analyzed with a Wilcoxon matched-  
325 pairs signed-rank test, using an uncorrected significance threshold of  $p < 0.05$ .

326 For the neuroimaging results, we examined the volumetric relationship between the  
327 temporal horn and whole hippocampus, and each hippocampal subfield volume. Given that the  
328 volumetric data for all ROIs exhibited normality, linear regression was used. We included total  
329 intracranial volume in all regressions to reflect the volumetric dependencies of the hippocampus  
330 and temporal horn on overall head size. The threshold for significance was  $p < 0.05$ , and multiple  
331 comparison correction across subfields was performed with a threshold of 0.017 across the subfields  
332 to account for covariance between the subfields (Li and Ji, 2005).

## 333 **Results**

### 334 **Finite element modeling of human brain**

#### 335 **Strain and strain rate in the hippocampus and adjacent structures**

336 We first aimed at elucidating the changes in strain and strain rate distribution due to the  
337 presence of the temporal horn. Cross-sections of whole-brain strain and strain rate maps are  
338 presented in Fig. 3. Almost identical strain and strain rate patterns were predicted by these two  
339 models, with the exception of strains exceeding 0.2 (Fig. 3A-B) and strain rates over  $30 \text{ s}^{-1}$  (Fig.  
340 3C-D) around the temporal horn that was exclusively predicted by the TH-Model in all simulated  
341 loading cases.

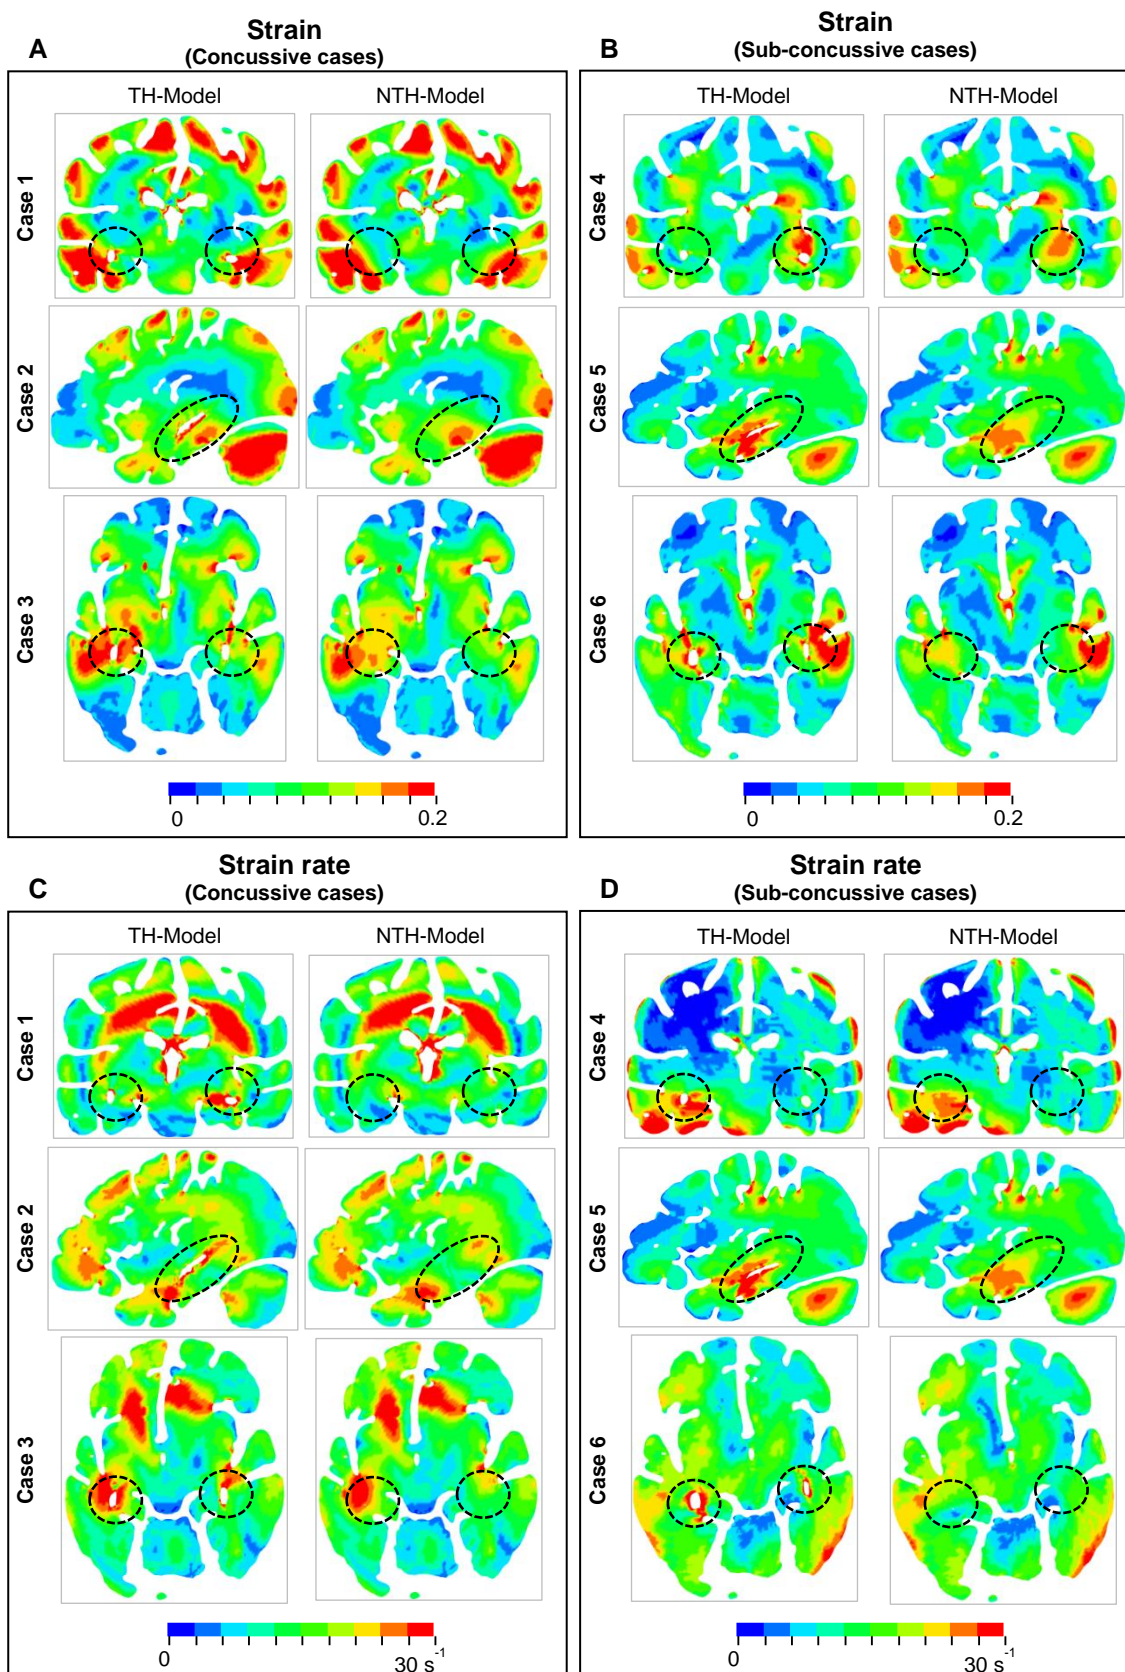

342  
343 **Fig. 3. Comparison of the maximum principal strain (A and B) and strain rate (C and D)**  
344 **distribution between the TH-model and NTH-model for three concussive and three**  
345 **sub-concussive impacts (Cases 1-3 and 4-6 respectively). The temporal horn and adjacent tissue are**  
346 **highlighted by black dashed ellipses.**

347 Close-up views of hippocampal strain and strain rate contours are presented in Fig. 4. Based  
348 on visual observation, regions experiencing strain over 0.2 in the TH-Model were more extensive  
349 with respect to their counterparts in the NTH-Model (Fig. 4A-B). This is particularly evident in  
350 CA1, CA2/3, and CA4/DG. Similarly, a more widespread distribution of strain rate over  $30 \text{ s}^{-1}$  was  
351 predicted by the TH-Model than the NTH-Model (Fig. 4C-D) in CA1, CA2/3, and HP Tail. This  
352 visual observation is quantitatively confirmed in Appendix D, in which larger volume ratios of  
353 strain over 0.2 and strain rate over  $30 \text{ s}^{-1}$  in the hippocampal subfields and the whole hippocampal  
354 level were predicted by the TH-Model with respect to the NTH-Model.



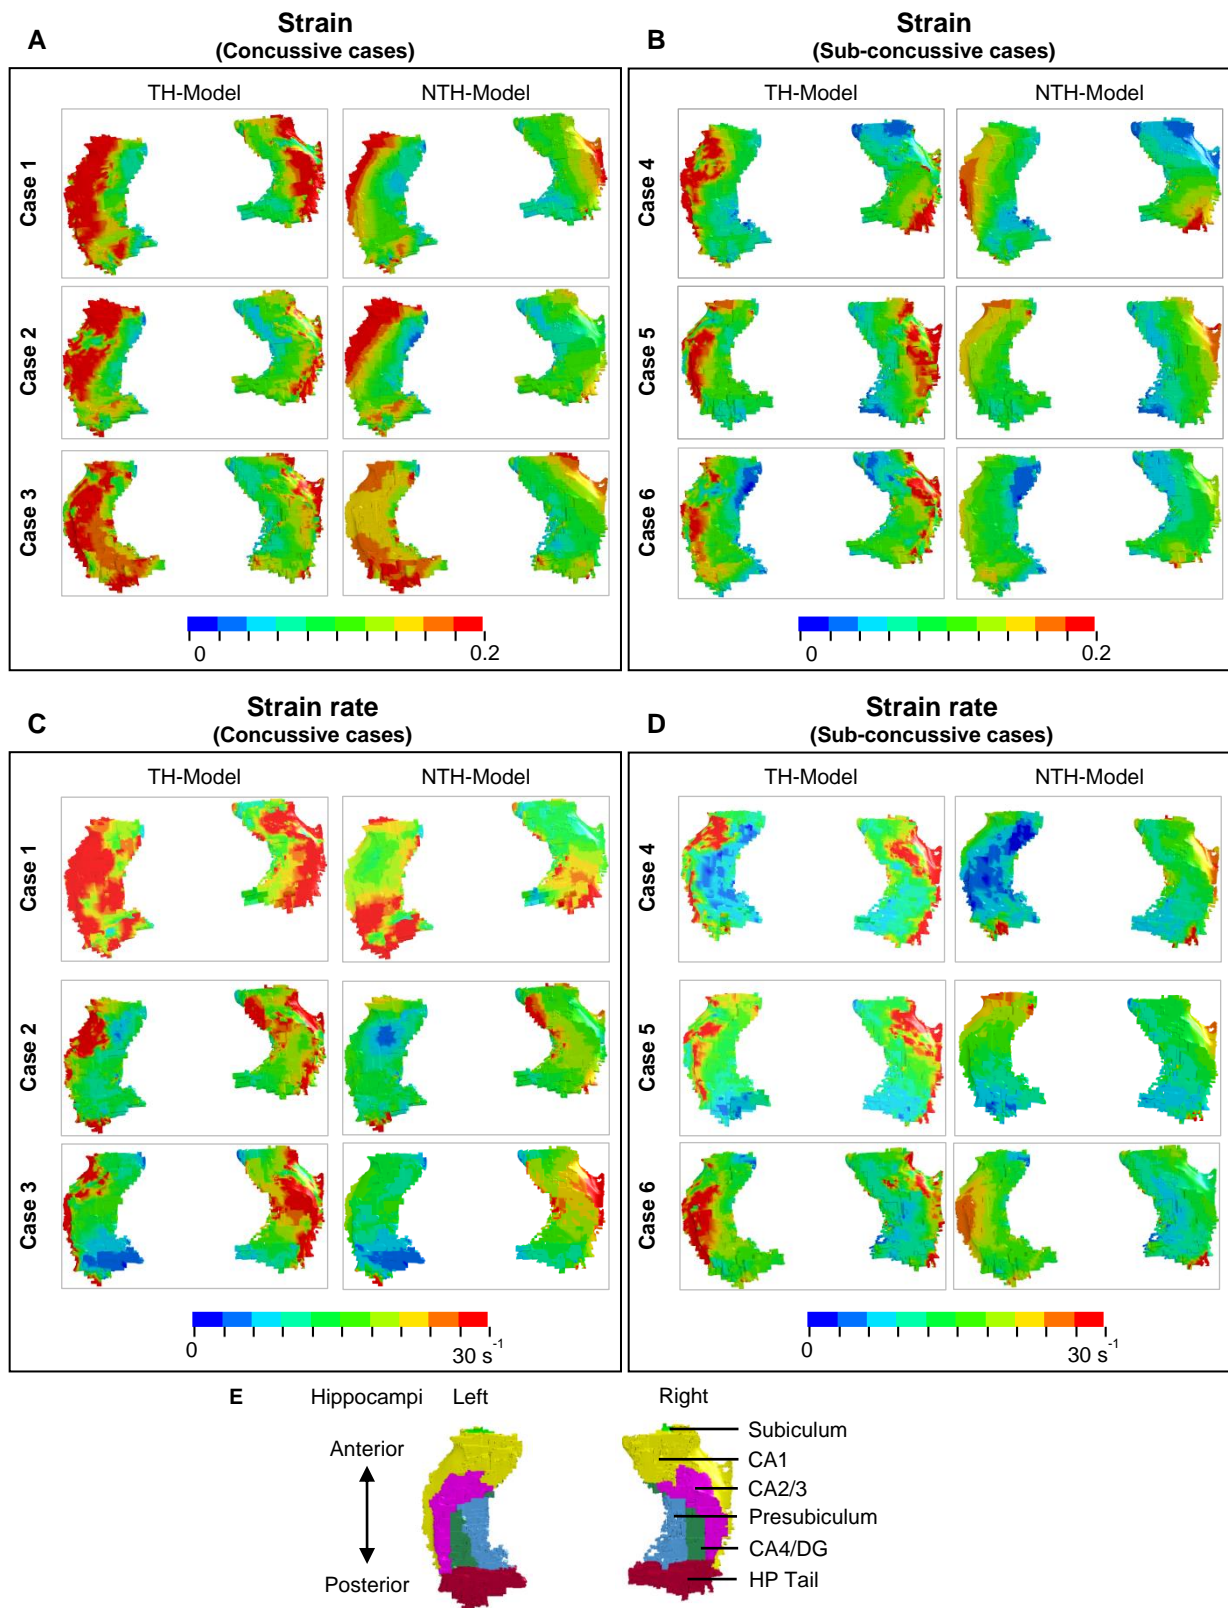

355  
 356 **Fig. 4. Comparison of strain distribution (A and B) and strain rate distribution (C and D)**  
 357 **in the hippocampi between the TH-model and NTH-model of three concussive impacts (Cases**  
 358 **1-3) and three sub-concussive impacts (Cases 4-6). Subfigure (E) illustrates the hippocampal**  
 359 **subfields. CA: cornu ammonis; DG: dentate gyrus; HP Tail: hippocampal tail.**  
 360

361 Fig 5 shows a quantitative depiction of the findings in Fig. 4 with special focus on the  
362 peaking values: the addition of the temporal horn elevated the 95<sup>th</sup> percentile maximum principal  
363 strain for almost all subfields and the whole hippocampus under all loading cases with the largest  
364 elevation (111.0 %) noted in CA2/3 in Case 5 (Fig. 4A-B). Similarly, the 95<sup>th</sup> percentile maximum  
365 strain rate was increased per the addition of the temporal horn for almost all hippocampal subfields  
366 and the whole hippocampus, with the largest increase (168.0%) in HP Tail in Case 2 (Fig. 4C-D).  
367 Any decrements in strain or strain rate were less than 5%.

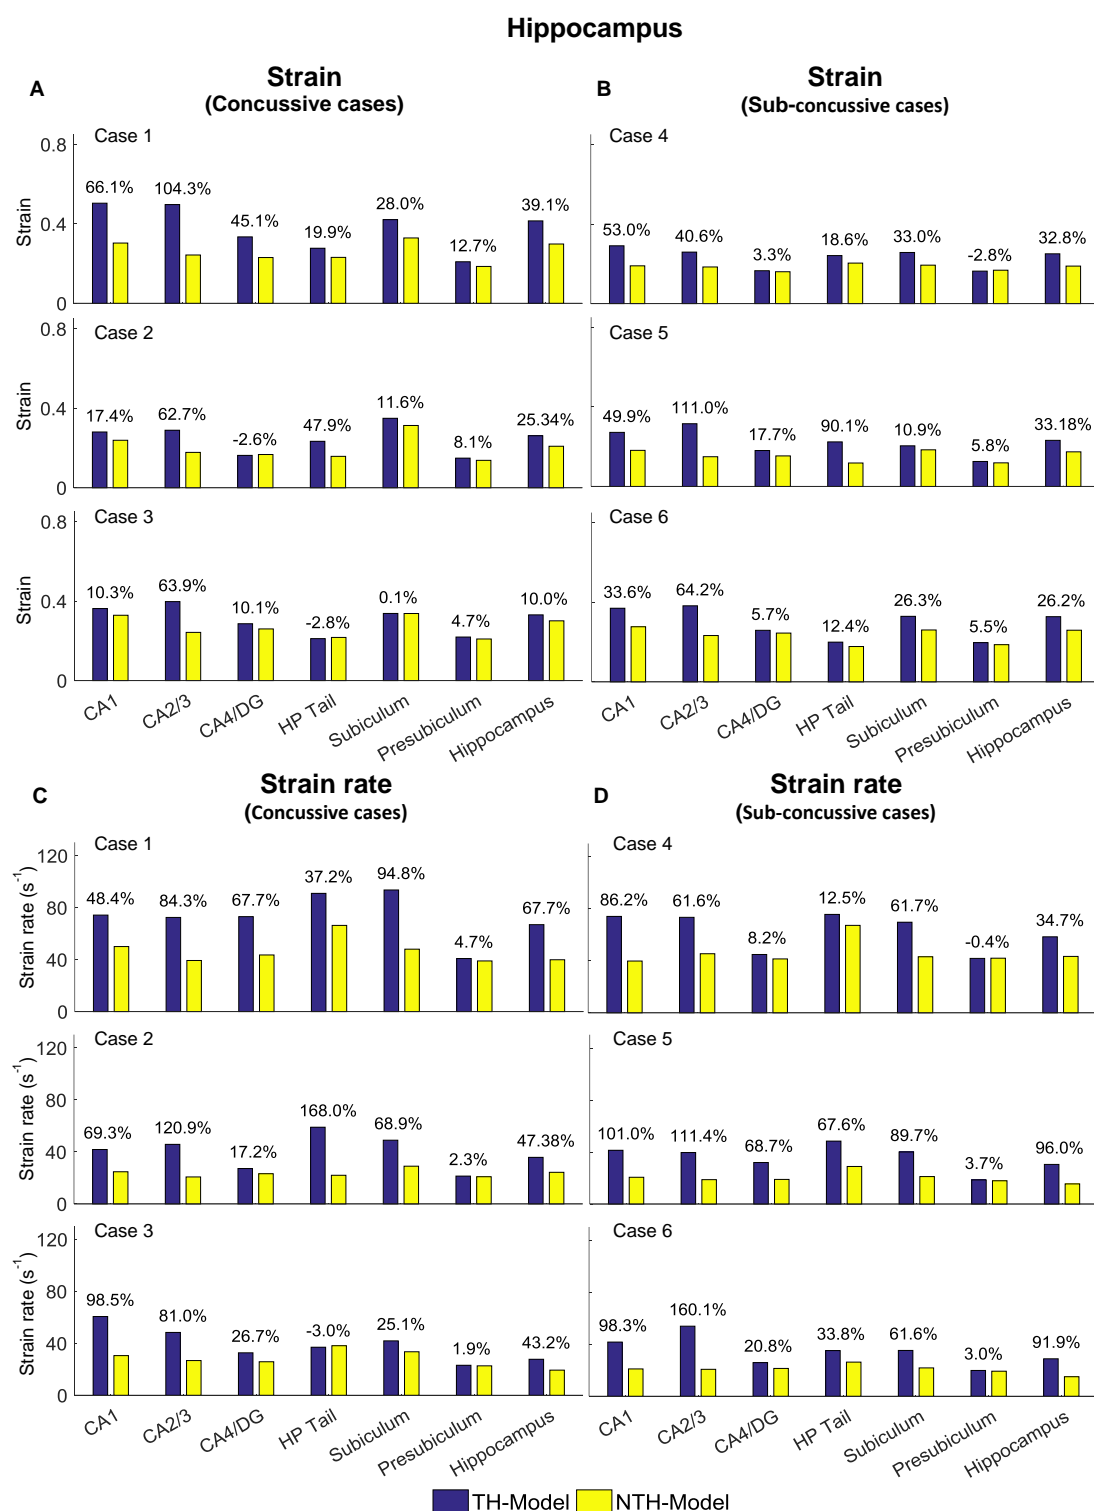

368

369

370

371

372

373

374

375

**Fig. 5. Comparison of the 95<sup>th</sup> percentile maximum principle strain and strain rate in the hippocampal subfields and the whole hippocampus between the TH-Model and NTH-model of 3 concussive impacts (Cases 1-3) and 3 sub-concussive impacts (Cases 4-6).** (A) Comparison of strain in the hippocampal subfields of 3 concussive impacts. (B) Comparison of strain in the hippocampal subfields of 3 sub-concussive impacts. (C) Comparison of strain rate in the hippocampal subfields of 3 concussive impacts. (D) Comparison of strain rate in the hippocampal subfields of 3 sub-concussive impacts. Percentages in strain difference and strain rate difference

376 are calculated with the results of the NTH-Model as the baseline. CA: cornu ammonis; DG: dentate  
377 gyrus; HP Tail: hippocampal tail.

378 We next aimed at identifying the anatomical regions most affected by the presence of the  
379 temporal horn. Using a Wilcoxon matched-pairs signed-rank tests on the region-wise strain and  
380 strain rate, we found considerable increases in strain (median value of percent strain difference >5%)  
381 on all six hippocampal subfields and the whole hippocampus at significant levels ( $p < 0.05$ ) (Table  
382 3.A). For the strain rate, considerable increases (median value of percent strain rate difference >5%)  
383 were noted in all subfields except for the presubiculum.

384 **Table 3. Wilcoxon matched-pairs signed-rank test on the region-wise strain and strain rate in**  
385 **the hippocampal subfields and whole hippocampus (A) and non-hippocampal regions (B)**  
386 **(N=6).** Percentages in strain difference and strain rate difference between the TH-Model and NTH-  
387 model were calculated across all simulations and presented in the form of median and two quartile  
388 values with Q1 as 25<sup>th</sup> percentile value and Q3 as 75<sup>th</sup> percentile value. Note that N equals to the  
389 number of impacts simulated by each model. CA: cornu ammonis; DG: dentate gyrus; HP Tail:  
390 hippocampal tail; Ventral DC: ventral diencephalon; CC: corpus callosum.

| <b>A</b> | Regions      | Percentage in strain difference |       | Percentage in strain rate difference |       |
|----------|--------------|---------------------------------|-------|--------------------------------------|-------|
|          |              | (median (Q1, Q3)) (%)           | p     | (median (Q1, Q3)) (%)                | p     |
|          | CA1          | 44.6 (33.6, 53.0)               | 0.028 | 92.3 (69.3, 98.5)                    | 0.028 |
|          | CA2/3        | 64.6 (62.7, 104.3)              | 0.028 | 97.9 (81.0, 121.0)                   | 0.028 |
|          | CA4/DG       | 11.7 (3.2, 21.8)                | 0.046 | 23.7 (17.2, 67.6)                    | 0.028 |
|          | HP Tail      | 33.9 (18.6, 54.3)               | 0.046 | 35.5 (12.5, 67.6)                    | 0.046 |
|          | Subiculum    | 6.9 (5.5, 11.2)                 | 0.046 | 65.3 (61.6, 89.7)                    | 0.028 |
|          | Presubiculum | 19.9 (11.6, 28.0)               | 0.028 | 2.7 (1.9, 3.7)                       | 0.046 |
|          | Hippocampus  | 29.5 (25.3, 33.2)               | 0.028 | 57.5 (34.7, 91.9)                    | 0.028 |
| <b>B</b> | Regions      | Percentage in strain difference |       | Percentage in strain rate difference |       |
|          |              | (median (Q1, Q3)) (%)           | p     | (median (Q1, Q3)) (%)                | p     |
|          | Amygdala     | 33.8 (17.1, 39.3)               | 0.028 | 50.9 (40.4, 56.1)                    | 0.028 |
|          | Ventral DC   | 8.2 (4.6, 12.2)                 | 0.028 | 9.35 (3.7, 13.1)                     | 0.028 |
|          | Pallidum     | -1.7 (-4.2, 2.1)                | 0.249 | -0.6 (-4.2, 4.4)                     | 0.753 |
|          | Putamen      | -1.4 (-2.3, 2.8)                | 0.249 | 2.2 (-0.4, 4.7)                      | 0.173 |
|          | Caudate      | 1.5 (0.7, 5.5)                  | 0.917 | 0.1 (-2.5, 0.9)                      | 0.463 |
|          | CC           | 0.7 (0.0, 1.3)                  | 0.249 | 2.5 (-0.4, 3.6)                      | 0.116 |

391 Among the non-hippocampal regions, both strain and strain rate were elevated in the TH-  
392 Model in the amygdala, which is along the anterosuperior border of the temporal horn, and to a  
393 lesser extent in the nearby ventral DC (Appendix E, Table 3.B). For the remaining more-distant

394 regions, percentage differences in strain and strain rate were constantly less than 5% across the  
395 simulated loading cases.

### 396 **Stress in hippocampus and temporal horn**

397 We then went on to explain the biomechanical reason for the hippocampal vulnerability. To  
398 ascertain the alteration of stress transmission associated with the temporal horn, Fig. 6A-B  
399 illustrates the maximum shear stress (i.e., a force triggering critical tissue deformation) endured by  
400 the temporal horn and hippocampus in the TH-Model and their counterparts in the NTH-Model,  
401 respectively. A much larger magnitude of shear stress in the hippocampus was noted in the TH-  
402 Model compared to the NTH-Model across all the cases (Fig. 6A). Conversely, the maximum shear  
403 stresses were less than 100 Pa in the temporal horn in the TH-Model, and over 1000 Pa in the  
404 temporal horn substitute in the NTH-Model (Fig. 6B). In addition, the distribution of shear stress  
405 within the hippocampus and temporal horn for one representative cases (Case 2) are illustrated in  
406 Fig. 6C-D, in which a wider distribution of shear stress over 1000 Pa in the hippocampus was noted  
407 in the TH-Model compared to the NTH-Model. It is thus indicated that an altered stress transmission  
408 associated with the temporal horn causes elevations in strain and strain rate.

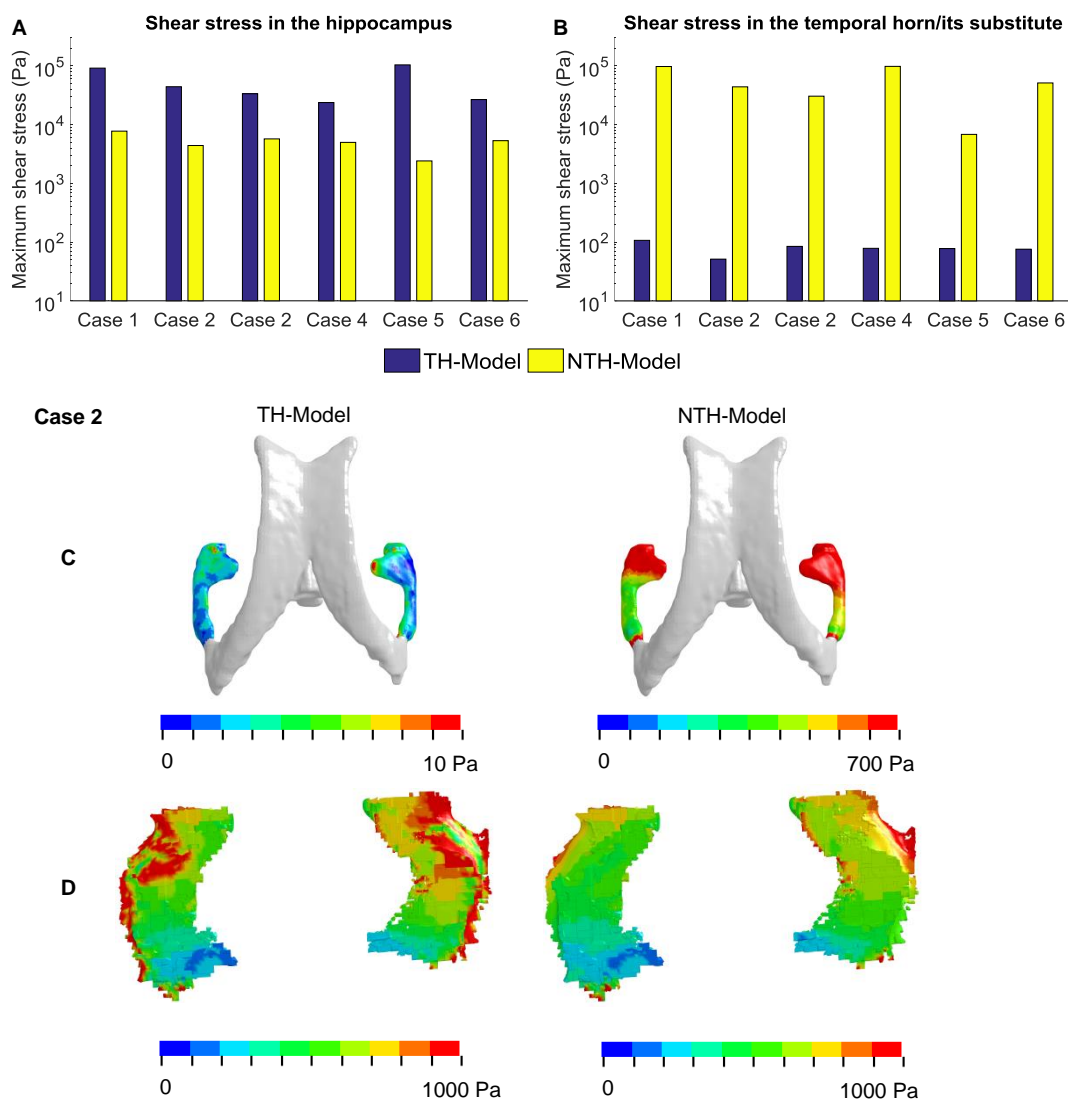

**Fig. 6. Maximum shear stresses in the hippocampus (A) and temporal horn/its substitute (B) predicted by the TH-Model and NTH-Model in 6 cases; (C) Contours of maximum shear stress in the CSF within the temporal horn in the TH-Model and its substitute in the NTH-Model; (D) Contours of maximum shear stress endured by the hippocampi in the TH-Model and NTH-Model. Note that, in the NTH-Model, the temporal horn is modeled as brain, not fluid.**

## Neuroimaging analysis

We then sought to identify if increased strains associated with the presence of the temporal horn would potentially be reflected in the volumetric relationship between the temporal horn and hippocampus in living subjects. We analyzed MRI of 91 male collegiate athletes (59 football (22 with a history of prior concussion), 32 volleyball (2 with a history of prior concussion), mean age (standard deviation) = 19.3 (1.43) years) to determine the volumetric relationship between the hippocampus and temporal horn by segmenting T1- and T2-weighted images, regressing out head size. The temporal horn size and total hippocampal volume were found to have a negative linear

423 relationship (coefficient [difference in hippocampal volume over difference in temporal horn  
424 volume] = -0.929,  $p=0.001$ ) (Fig. 7A). Inverse linear correlations between temporal horn volume  
425 and subfield volumes were found in CA1 (coefficient = -0.294,  $p=0.002^*$ (note that \* represents a  
426 threshold of 0.017 was attained for the survives multiple comparison correction)) (Fig. 7B), CA2-  
427 4/DG (coefficient = -0.176,  $p=0.019$ ) (Fig. 7C), and ERC/PRC (coefficient = -0.383,  $p=0.027$ ), but  
428 not in the subiculum (coefficient = -0.072,  $p=0.056$ ).. After excluding the two outliers with the  
429 temporal horn volume over  $1000 \text{ mm}^3$ , correlations of temporal horn with total hippocampal  
430 volume (coefficient = -0.892,  $p=0.030$ ), CA1 (coefficient = -0.288,  $p=0.037$ ), and CA2-4/DG  
431 (coefficient = -0.222,  $p=0.039$ ) remained significant, while the correlation with ERC/PRC volume  
432 was no longer significant ( $p=0.180$ ).

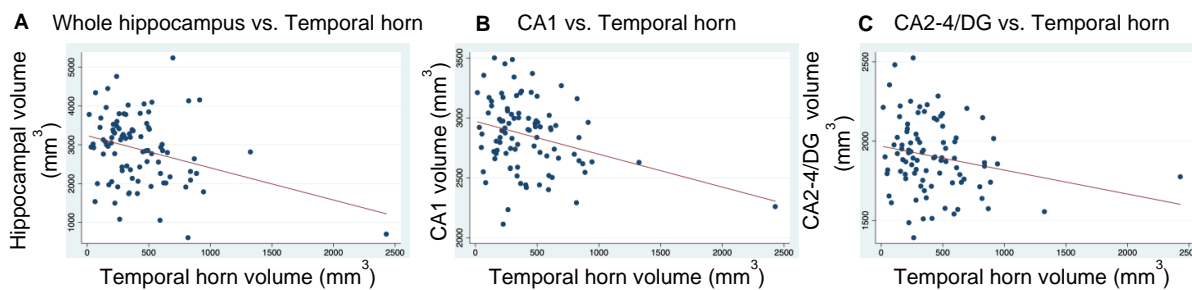

433

434 **Fig. 7. Inverse volumetric relationship of temporal horn with the whole hippocampus (A),**  
435 **with CA1 (B), and with CA2-4/DG (C), derived using automated segmentation using ASHS**  
436 **of *in vivo* data on 91 participants.**

## 437 Discussion

438 The current study attempted to elucidate why the hippocampus is so commonly affected by  
439 brain trauma. We used two FE models: one with and the other without the temporal horn, and  
440 incorporated an anatomically accurate description of temporal horn, a mechanically realistic  
441 representation of intraventricular CSF as fluid elements, and a fluid-structure interaction coupling  
442 approach for the brain-ventricle interface. The presence of the temporal horn not only extended the  
443 distribution of high strains and strain rates in the surrounding area, but also increased their  
444 magnitude in the hippocampus, particularly in the subfields of CA1, CA2/3, HP Tail, subiculum,  
445 and presubiculum. Other adjacent regions including the amygdala and ventral DC showed similarly

446 increased strain and strain rate with the presence of the temporal horn, but distant regions (e.g.,  
447 corpus callosum) did not. These computational findings support the hypothesis that the presence of  
448 the temporal horn exacerbates the biomechanical vulnerability of the hippocampus following head  
449 impacts, yielding a potential biomechanical explanation for the prevalence of hippocampal injury  
450 in TBI. In addition, our *in vivo* neuroimaging analysis in a collegiate athlete cohort revealed that  
451 the volume of the temporal horn is inversely correlated with the hippocampal volume.

452 This biomechanical finding correlates well with the prevalence of hippocampal trauma in  
453 humans data and animal biomechanical models. Several postmortem neuropathological studies  
454 (Kotapka et al., 1992;Kotapka et al., 1993;Kotapka et al., 1994;Maxwell et al., 2003) have detected  
455 overt neuronal damage/loss in the hippocampus of TBI victims with high incidence rates up to 73%-  
456 87% (although the exact loadings endured were lacking). Animal models employing custom-built  
457 pneumatic devices that deliver impulsive angular accelerations, similar to the loading mode in the  
458 current study, have shown hippocampal lesions in non-human primates (Gennarelli et al.,  
459 1982;Kotapka et al., 1991), which have a similar hippocampal morphology and spatial relationship  
460 to the temporal horn (Insausti and Amaral, 2003;Amaral et al., 2007). A version of the device  
461 modified to deliver impulsive loading caused selective hippocampal damage to porcine brains  
462 (Smith et al., 1997) (which again have a similar relationship between the hippocampus and temporal  
463 horn to humans (Félix et al., 1999)). Thus, animal models with similar morphological relationships  
464 between the temporal horn and hippocampus support a biomechanical link between the two.

465 Our computational results predicted an altered stress transmission associated with the  
466 temporal horn, providing an explanation for the elevations in strain and strain rate in the TH-Model.  
467 As illustrated in Fig. 6B, the shear stress endured by the temporal horn in the TH-Model was less  
468 than 100 Pa, which realistically reflected the low shear resistance nature of CSF. Comparatively,  
469 the shear stress experienced by the substitute of the temporal horn (i.e., brain parenchyma) in the  
470 NTH-Model was over 1000 Pa, providing an unrealistic interaction with the neighboring tissue.



471 These regions adjacent to the temporal horn (such as the hippocampus, amygdala, and ventral DC,  
472 as are the ROIs in the current study) were easier to deform associated with the addition of the  
473 temporal horn in the TH-Model, consequently exacerbating the strain and strain rate in these ROIs.  
474 This explanation was further verified in Fig. 6A, where the shear stress endured by the hippocampus  
475 was larger in the TH-Model, consistent with an amplified force exerted on the hippocampus with  
476 the addition of the temporal horn.

477 Two previous computational studies simulated football head impacts, consistently reporting  
478 an increased susceptibility of the hippocampus to injury (Viano et al., 2005; Zhao et al., 2017).  
479 However, the ventricular elements in these two models and other ones (Kleiven, 2007; Mao et al.,  
480 2013; Atsumi et al., 2018; Trotta et al., 2020) were manually picked with reference to the brain atlas,  
481 lacking mesh conformity of the anatomic ventricle profile. Our work used a novel FE model of the  
482 brain that involves orders of magnitude more elements than used in typical models (e.g., millions  
483 instead of thousands), enabling a realistic depiction of the geometrical features of the temporal horn.  
484 Intraventricular CSF elements in existing head models (Viano et al., 2005; Kimpara et al.,  
485 2006; Takhounts et al., 2008; Mao et al., 2013; Ho et al., 2017; Zhao et al., 2017; Zhou et al., 2019a; Li  
486 et al., 2020) are predominantly represented by Lagrangian elements, with the mesh following the  
487 material deformation without material advection, neglecting the potential fluid flow during the  
488 impact. Here, we leveraged a fluid element formulation (i.e., ALE multi-material formulation) for  
489 the cerebral ventricle, emulating the fluid properties of intraventricular CSF and potential fluid flow  
490 following external stimuli. To couple the mechanical responses of the ALE-represented ventricular  
491 CSF elements with the Lagrangian-represented brain elements, a penalty-based coupling was  
492 implemented. Such a coupling algorithm permits relative motion in the tangential direction and  
493 deliveries tension and compression in the radial direction, circumventing severe element distortion  
494 at the interfacial boundary. The FSI approach excels in not only realistically representing the fluid  
495 behavior of the CSF but also maintaining numerical stability without causing severe element

496 distortion, supporting its validity for the current application. Nevertheless, it is worth clarifying that  
497 our data suggest that omitting the temporal horn, as is the case in most existing head models, may  
498 still be acceptable for these studies that focus on regions far from the temporal horn (e.g., corpus  
499 callosum, caudate, putamen, pallidum).

500 Hippocampal cell death tolerance criteria were presented by Cater et al. (2006) by relating  
501 three independent variables (i.e., strain in the range of 0.05 to 0.5, hippocampal subfields, time  
502 post-injury) to resultant cell death under *in vitro* conditions via mathematical equations, which were  
503 valid within the strain rate regime of 0.1-50 s<sup>-1</sup>. Similarly, another *in vitro* study reported tolerance  
504 criteria for hippocampal function impairment in the form of mathematical formulations between  
505 input mechanical stimuli (i.e., strain up to 0.44 and strain rate up to 30 s<sup>-1</sup>) and output  
506 electrophysiological alterations (Kang and Morrison, 2015). In the current study, the hippocampal  
507 responses predicted by the TH-Model peaking from 0.29 to 0.50 for strain and from 53.9 s<sup>-1</sup> to 93.6  
508 s<sup>-1</sup> for strain rate in the six simulated impacts. The range of FE-derived strains and strain rates  
509 reached the criteria of electrophysiological impairment and cell death, correlating with the clinical  
510 diagnosis of concussion and sub-concussion of the players. However, it should be noted that certain  
511 disparities existed between the data ranges of the current computational results and the loading  
512 regimes from which these two hippocampus-related tolerance criteria were fitted. Moreover, the  
513 cultured hippocampal slices in Cater et al. (2006) and Kang and Morrison (2015) were obtained  
514 from the rat brain. Extrapolation of the tolerance criteria derived from the animal brain under *in*  
515 *vitro* conditions to the human brain under *in vivo* conditions requires further verification (Seok et  
516 al., 2013).

517 While the presence of the CSF-filled temporal horn may be a predisposing factor for  
518 hippocampal injury, additional mechanisms, such as the selective vulnerability of hippocampal  
519 neurons to hypoxemia and ischemia (Pulsinelli, 1985;Ng et al., 1989) and pathological neuronal  
520 excitation involving glutamate and other excitatory amino acid neurotransmitters (Faden et al.,

521 1989; Bullock et al., 1990), may play important roles in human hippocampal injury. We suggest that  
522 the adverse effects of the temporal horn during the primary impact, the superimposed  
523 hypoxia/ischemia and neuroexcitotoxicity secondary to the impact, as well as other potential  
524 unknown mechanisms, collectively contribute to the prevalence of hippocampal injury in TBI  
525 victims.

526 To see if the modeled relationship between the presence of the temporal horn and associated  
527 increased strains/strain rates had an *in vivo* correlation, we analyzed the neuroimaging of 91  
528 participants without a prior history of severe brain injury (though several did have a concussion  
529 history). The temporal horn size was inversely correlated with both the total hippocampus volume  
530 and several hippocampal subfields, including CA1 and CA2-4/DG, in this collegiate cohort. The  
531 lower hippocampal volume might possibly be secondary to injury from the increased strain/strain  
532 rate associated with the presence of the temporal horn. This finding reflects prior work in TBI  
533 (Bigler et al., 1997), in which a negative correlation between temporal horn size and hippocampal  
534 volume was only noted within the cohort of TBI patients, not in the control group. Such a disparity  
535 might be associated with the aging difference of enrolled subjects between our work and the  
536 previous study. In our work, the enrolled subjects were male collegiate students (mean age  $\pm$   
537 standard deviation:  $19.3 \pm 1.43$  years). The age of controlled subjects in the previous study (Bigler  
538 et al., 1997) ranged from 16-year-old to 65-year-old. Such a wide age window may further  
539 compound the relationship of the hippocampus and temporal horn considering the development  
540 variation to the brain in normal aging (Van Petten, 2004). However, it should be clarified that the  
541 exact source responsible for this disparity remains elusive.

## 542 **Limitations and future work**

543 Although the current study yielded some new insights into the biomechanical and  
544 volumetric dependencies of the hippocampus on the temporal horn, certain limitations exist which  
545 require further investigation. First, only 6 representative sports-related inertial impacts were

546 simulated in the current study with the severities at concussive and sub-concussive levels. A  
547 systematic investigation that covers more impact-related variables (e.g., impact duration, impact  
548 directions, rotational velocity) with their magnitudes spanning over the regimes measured from the  
549 realistic impacts is planned for future work to identify the critical scenarios that the temporal horn  
550 exhibited a more pronounced effect on the hippocampus. Moreover, caution should be exercised  
551 when extrapolating the current findings obtained from concussive and sub-concussive impacts to  
552 extra injury scenarios (e.g., fatal brain injury, penetrating head injury).

553 Secondly, due to the computational challenges, the brain-skull interfaces in both models in  
554 the current study were simulated by approximating the subarachnoid CSF as a Lagrangian-  
555 represented structure. Given that the ROIs in the current study are all located at central brain regions,  
556 the influence exerted by the brain-skull influence on the deep brain structures was expected to be  
557 limited (Kleiven and Hardy, 2002). Per the benefits of using ALE elements for the cerebral  
558 ventricles, the impact-induced fluid flow was considered, but not quantified in the current study. A  
559 detailed examination of flow patterns of CSF remains to be appropriately quantified in the future  
560 (Lang and Wu, 2021).

561 Thirdly, to incorporate explicit representations of the hippocampal subfields in the FE  
562 models, Freesurfer was used to segment the MRI with a resolution of  $1 \times 1 \times 1 \text{ mm}^3$  to take  
563 advantage of the isotropic high-resolution atlas and incorporate this detailed isotropic segmentation  
564 into the FE model. Such a software choice was also for the consistency purpose, since the brain  
565 profile used for the development of FE model was obtained from Freesurfer. However, it should be  
566 highlighted there are many different segmentation methods for hippocampal subfields, presenting  
567 certain variances in specific subfield delineation (Yushkevich et al., 2015;Wisse et al., 2021). Thus,  
568 caution should be exercised when using Freesurfer for hippocampal subfield segmentation (Wisse  
569 et al., 2014). In fact, there appear no approaches with guaranteed utility and validity to segment  
570 hippocampal subfield from isotropic  $1 \text{ mm}^3$  MRI (Wisse et al., 2021), as is the case for the subfield

571 delineation in the FE model. This segment-induced error inevitably compromised the accuracy of  
572 hippocampal subfield representations in the FE model, which is a limitation of the current study.  
573 Nevertheless, compared with the studies in which the hippocampus was treated as a single medium  
574 (Takhounts et al., 2008;Mao et al., 2013;Miller et al., 2016;Atsumi et al., 2018;Li et al., 2020;Trotta  
575 et al., 2020;Zhou et al., 2020a), the current work made the first step to differentiate the hippocampal  
576 substructures in the FE model of the human brain. Future work is planned to further refine the  
577 model towards an anatomically more authentic hippocampal subfield representation. For the in vivo  
578 imaging, we sought to determine individual subject differences, and have a fully characterized and  
579 quality-control assessed segmentation on high-resolution anisotropic data using ASHS in this large  
580 cohort. While the differences in these two segmentation methods used in the current work, they  
581 both show differences in the central hippocampus (CA3/4/DG), which is not a high region of  
582 variability between segmentation methods (Yushkevich et al., 2015).

583         Lastly, the subjects involved in the neuroimaging analysis were not those with the impacts  
584 simulated using the computational models. Thus, it remains to be further verified whether the lower  
585 hippocampal volume observed from the collegiate athletes is due to the increased strain/strain rate  
586 associated with the presence of the temporal horn during head impacts versus other factors.  
587 Ongoing effort is dedicated to deploy instrumented mouthguards to football players, obtaining real-  
588 time measurements of the impacts sustained by these players (Camarillo et al., 2013;Hernandez et  
589 al., 2015;Domel et al., 2020;Liu et al., 2020b). This information is complemented by medical  
590 imaging of the football players pre- and post-impact (Parivash et al., 2019;Mills et al., 2020).  
591 Another possible direction for future work is to correlate on-field football impacts, to  
592 computationally predicted hippocampal deformation, to image-based evidence of hippocampal  
593 injury.

## 594 **Conclusion**

595           This study investigated the biomechanical mechanism of hippocampal injury associated  
596 with the presence of the temporal horn by leveraging two models, with and without the inclusion  
597 of the temporal horn. The results showed that the temporal horn has a significant biomechanical  
598 effect in the surrounding area and induces increased magnitudes of the strain and strain rate in the  
599 hippocampus throughout its subfields, identifying the temporal horn as a predisposing factor for  
600 hippocampal injury. Our *in vivo* human imaging analysis revealed that the volume of the temporal  
601 horn is inversely correlated with the hippocampal volume and hippocampal subfields commonly  
602 involved in hippocampal injury. Our biomechanical and neuroimaging effort collectively highlight  
603 the mechanobiological and anatomical interdependency between the hippocampus and temporal  
604 horn. This study suggests that proper modeling of the temporal horn be considered when developing  
605 mechanical tolerance and designing protective strategies specifically for the hippocampus.

## 606 **Acknowledgements**

607           Drs. Michael Zeineh, Gerald Grant, and David Camarillo received funding from the Pac-12  
608 Conference's Student-Athlete Health and Well-Being Initiative and Taube Stanford Children's  
609 Concussion Initiative. Drs. Svein Kleiven and Xiaogai Li received funding from the Swedish  
610 Research Council (VR-2016-05314 and VR-2016-04203), while Dr. Marios Georgiadis received  
611 funding from the Swiss National Science Foundation (P400PM\_180773). Zhou Zhou received  
612 funding from KTH Royal Institute of Technology (Stockholm, Sweden). The content of this article  
613 is solely the responsibility of the authors and does not necessarily represent the official views of  
614 funding agencies. The simulations were performed on resources provided by the Swedish National  
615 Infrastructure for Computing (SNIC) at the center for High Performance Computing (PDC). Gong  
616 Jing at the PDC center is acknowledged for the technical maintenance of needed software employed  
617 in the current study. In addition, the authors thank Dr. Erin Bigler at the University of Utah School  
618 of Medicine for helpful discussion and the reviewers for the stimulating comments and valuable  
619 suggestions that substantially improved this paper.

## References

- 620  
621 Aïmediou, P., and Grebe, R. (2004). Tensile strength of cranial pia mater: preliminary results.  
622 *Journal of neurosurgery* 100, 111-114.
- 623 Amaral, D., Andersen, P., O'keefe, J., and Morris, R. (2007). *The hippocampus book*. Oxford  
624 University Press.
- 625 Anderson, R.W., Brown, C.J., Blumbergs, P.C., Mclean, A.J., and Jones, N.R. (2003). Impact  
626 mechanics and axonal injury in a sheep model. *Journal of neurotrauma* 20, 961-974.
- 627 Atsumi, N., Nakahira, Y., Tanaka, E., and Iwamoto, M. (2018). Human brain modeling with its  
628 anatomical structure and realistic material properties for brain injury prediction. *Annals of*  
629 *biomedical engineering* 46, 736-748.
- 630 Baldwin, S.A., Gibson, T., Callihan, C.T., Sullivan, P.G., Palmer, E., and Scheff, S.W. (1997).  
631 Neuronal cell loss in the CA3 subfield of the hippocampus following cortical contusion  
632 utilizing the optical disector method for cell counting. *Journal of neurotrauma* 14, 385-  
633 398.
- 634 Barnes, J., Ridgway, G.R., Bartlett, J., Henley, S.M., Lehmann, M., Hobbs, N., Clarkson, M.J.,  
635 Macmanus, D.G., Ourselin, S., and Fox, N.C. (2010). Head size, age and gender  
636 adjustment in MRI studies: a necessary nuisance? *Neuroimage* 53, 1244-1255.
- 637 Batterbee, D., Sims, N., Becker, W., Worden, K., and Rowson, J. (2011). Computational model of  
638 an infant brain subjected to periodic motion simplified modelling and bayesian sensitivity  
639 analysis. *Proceedings of the Institution of Mechanical Engineers, Part H: Journal of*  
640 *Engineering in Medicine* 225, 1036-1049.
- 641 Bigler, E.D., Andersob, C.V., and Blatter, D.D. (2002). Temporal lobe morphology in normal  
642 aging and traumatic brain injury. *American Journal of Neuroradiology* 23, 255-266.
- 643 Bigler, E.D., Blatter, D.D., Anderson, C.V., Johnson, S.C., Gale, S.D., Hopkins, R.O., and  
644 Burnett, B. (1997). Hippocampal volume in normal aging and traumatic brain injury.  
645 *American Journal of Neuroradiology* 18, 11-23.
- 646 Bigler, E.D., and Tate, D.F. (2001). Brain volume, intracranial volume, and dementia.  
647 *Investigative radiology* 36, 539-546.
- 648 Bird, C.M., and Burgess, N. (2008). The hippocampus and memory: insights from spatial  
649 processing. *Nature Reviews Neuroscience* 9, 182-194.
- 650 Bullock, R., Butcher, S., and Mcculloch, J. (1990). "Changes in extracellular glutamate  
651 concentration after acute subdural haematoma in the rat—evidence for an “excitotoxic”  
652 mechanism?," in *Brain Edema VIII*. Springer), 274-276.
- 653 Camarillo, D.B., Shull, P.B., Mattson, J., Shultz, R., and Garza, D. (2013). An instrumented  
654 mouthguard for measuring linear and angular head impact kinematics in American  
655 football. *Annals of biomedical engineering* 41, 1939-1949.
- 656 Cameron, K.L., Marshall, S.W., Sturdivant, R.X., and Lincoln, A.E. (2012). Trends in the  
657 incidence of physician-diagnosed mild traumatic brain injury among active duty US  
658 military personnel between 1997 and 2007. *Journal of neurotrauma* 29, 1313-1321.
- 659 Cater, H.L., Sundstrom, L.E., and Morrison Iii, B. (2006). Temporal development of hippocampal  
660 cell death is dependent on tissue strain but not strain rate. *Journal of biomechanics* 39,  
661 2810-2818.
- 662 Cecchi, N.J., Domel, A.G., Liu, Y., Rice, E., Lu, R., Zhan, X., Zhou, Z., Raymond, S.J., Sami, S.,  
663 and Singh, H. (2021). Identifying Factors Associated with Head Impact Kinematics and  
664 Brain Strain in High School American Football via Instrumented Mouthguards. *Annals of*  
665 *Biomedical Engineering*, 1-13.
- 666 Contijoch, F., Witschey, W.R., Rogers, K., Rears, H., Hansen, M., Yushkevich, P., Gorman, J.,  
667 Gorman, R.C., and Han, Y. (2015). User-initialized active contour segmentation and  
668 golden-angle real-time cardiovascular magnetic resonance enable accurate assessment of

- 669 LV function in patients with sinus rhythm and arrhythmias. *Journal of cardiovascular*  
670 *magnetic resonance* 17, 1-12.
- 671 Dewan, M.C., Rattani, A., Gupta, S., Baticulon, R.E., Hung, Y.-C., Punchak, M., Agrawal, A.,  
672 Adeleye, A.O., Shrimel, M.G., and Rubiano, A.M. (2018). Estimating the global incidence  
673 of traumatic brain injury. *Journal of neurosurgery* 130, 1080-1097.
- 674 Domel, A.G., Raymond, S.J., Giordano, C., Liu, Y., Yousefsani, S.A., Fanton, M., Pirozzi, I.,  
675 Kight, A., Avery, B., Boumis, A., Fetters, T., Jandu, S., Mehring, W.M., Monga, S.,  
676 Mouchawar, N., Rangel, I., Rice, E., Roy, P., Sami, S., Singh, H., Wu, L., Kuo, C.,  
677 Zeineh, M., Grant, G., and Camarillo, D.B. (2020). A New Open-Access Platform for  
678 Measuring and Sharing mTBI Data. *arXiv:2010.08485*.
- 679 Faden, A.I., Demediuk, P., Panter, S.S., and Vink, R. (1989). The role of excitatory amino acids  
680 and NMDA receptors in traumatic brain injury. *Science* 244, 798-800.
- 681 Félix, B., Léger, M.-E., Albe-Fessard, D., Marcilloux, J.-C., Rampin, O., Laplace, J.-P., Duclos,  
682 A., Fort, F., Gougis, S., and Costa, M. (1999). Stereotaxic atlas of the pig brain. *Brain*  
683 *research bulletin* 49, 1-137.
- 684 Fillmore, P.T., Phillips-Meek, M.C., and Richards, J.E. (2015). Age-specific MRI brain and head  
685 templates for healthy adults from 20 through 89 years of age. *Frontiers in aging*  
686 *neuroscience* 7, 44.
- 687 Fischl, B. (2012). FreeSurfer. *Neuroimage* 62, 774-781.
- 688 Gale, S.D., Johnson, S.C., Bigler, E.D., and Blatter, D.D. (1994). Traumatic brain injury and  
689 temporal horn enlargement: Correlates with tests of intelligence and memory.  
690 *Neuropsychiatry, Neuropsychology, & Behavioral Neurology* 7, 160-165.
- 691 Gennarelli, T.A., Thibault, L.E., Adams, J.H., Graham, D.I., Thompson, C.J., and Marcincin, R.P.  
692 (1982). Diffuse axonal injury and traumatic coma in the primate. *Annals of Neurology:*  
693 *Official Journal of the American Neurological Association and the Child Neurology*  
694 *Society* 12, 564-574.
- 695 Graham, D., Adams, J.H., and Doyle, D. (1978). Ischaemic brain damage in fatal non-missile  
696 head injuries. *Journal of the neurological sciences* 39, 213-234.
- 697 Graham, D., Ford, I., Adams, J.H., Doyle, D., Teasdale, G., Lawrence, A., and Mclellan, D.  
698 (1989). Ischaemic brain damage is still common in fatal non-missile head injury. *Journal*  
699 *of Neurology, Neurosurgery & Psychiatry* 52, 346-350.
- 700 Hallquist, J.O. (2007). "LS-DYNA keyword user's manual", in: *Livermore Software Technology*  
701 *Corporation.*
- 702 Hardy, W.N., Mason, M.J., Foster, C.D., Shah, C.S., Kopacz, J.M., Yang, K.H., King, A.I.,  
703 Bishop, J., Bey, M., and Anderst, W. (2007). A Study of the Response of the Human  
704 Cadaver Head to Impact. *Stapp Car Crash J* 51, 17-80.
- 705 Hernandez, F., Wu, L.C., Yip, M.C., Laksari, K., Hoffman, A.R., Lopez, J.R., Grant, G.A.,  
706 Kleiven, S., and Camarillo, D.B. (2015). Six degree-of-freedom measurements of human  
707 mild traumatic brain injury. *Annals of biomedical engineering* 43, 1918-1934.
- 708 Hicks, R., Soares, H., Smith, D., and McIntosh, T. (1996). Temporal and spatial characterization  
709 of neuronal injury following lateral fluid-percussion brain injury in the rat. *Acta*  
710 *neuropathologica* 91, 236-246.
- 711 Ho, J., Zhou, Z., Li, X., and Kleiven, S. (2017). The peculiar properties of the falx and tentorium  
712 in brain injury biomechanics. *Journal of biomechanics* 60, 243-247.
- 713 Holzapfel, A.G. (2000). Nonlinear solid mechanics II.
- 714 Insausti, R., and Amaral, D.G. (2003). "Hippocampal formation," in *The Human Nervous System:*  
715 *Second Edition*. Elsevier Inc.), 871-914.
- 716 Ji, S., Zhao, W., Ford, J.C., Beckwith, J.G., Bolander, R.P., Greenwald, R.M., Flashman, L.A.,  
717 Paulsen, K.D., and Mcallister, T.W. (2015). Group-wise evaluation and comparison of



- 718 white matter fiber strain and maximum principal strain in sports-related concussion.  
719 *Journal of neurotrauma* 32, 441-454.
- 720 Kalish, B.T., and Whalen, M.J. (2016). "Weight drop models in traumatic brain injury," in *Injury*  
721 *models of the central nervous system*. Springer), 193-209.
- 722 Kang, W.H., and Morrison, B. (2015). Functional tolerance to mechanical deformation developed  
723 from organotypic hippocampal slice cultures. *Biomechanics and Modeling in*  
724 *Mechanobiology* 14, 561-575.
- 725 Kimpara, H., Nakahira, Y., Iwamoto, M., and Miki, K. (2006). Investigation of Anteroposterior  
726 Head-Neck Responses during Severe Frontal Impacts Using a Brain-Spinal Cord Complex  
727 FE Model. *Stapp Car Crash Journal* 50, 509-544.
- 728 Kleiven, S. (2007). Predictors for traumatic brain injuries evaluated through accident  
729 reconstructions. *Stapp car crash journal* 51, 81-114.
- 730 Kleiven, S., and Hardy, W.N. (2002). Correlation of an FE model of the human head with local  
731 brain motion-consequences for injury prediction. *Stapp Car Crash Journal* 46, 123-144.
- 732 Kotapka, M., Graham, D., Adams, J., and Gennarelli, T. (1992). Hippocampal pathology in fatal  
733 non-missile human head injury. *Acta neuropathologica* 83, 530-534.
- 734 Kotapka, M., Graham, D., Adams, J., and Gennarelli, T. (1994). Hippocampal pathology in fatal  
735 human head injury without high intracranial pressure. *Journal of neurotrauma* 11, 317-  
736 324.
- 737 Kotapka, M., Graham, D., Adams, J.H., Doyle, D., and Gennarelli, T. (1993). Hippocampal  
738 damage in fatal paediatric head injury. *Neuropathology and applied neurobiology* 19, 128-  
739 133.
- 740 Kotapka, M.J., Gennarelli, T.A., Graham, D.I., Adams, J.H., Thibault, L.E., Ross, D.T., and Ford,  
741 I. (1991). Selective vulnerability of hippocampal neurons in acceleration-induced  
742 experimental head injury. *Journal of neurotrauma* 8, 247-258.
- 743 Lang, J., and Wu, Q. (2021). Modelling of the transient cerebrospinal fluid flow under external  
744 impacts. *European Journal of Mechanics-B/Fluids*.
- 745 Langlois, J.A., and Sattin, R.W. (2005). Traumatic brain injury in the United States: Research and  
746 programs of the Centers for Disease Control and Prevention (CDC)-Preface. *Journal of*  
747 *Head Trauma Rehabilitation* 20, 187-188.
- 748 Leranath, C., Szeideemann, Z., Hsu, M., and Buzsaki, G. (1996). AMPA receptors in the rat and  
749 primate hippocampus: a possible absence of GluR2/3 subunits in most interneurons.  
750 *Neuroscience* 70, 631-652.
- 751 Li, J., and Ji, L. (2005). Adjusting multiple testing in multilocus analyses using the eigenvalues of  
752 a correlation matrix. *Heredity* 95, 221-227.
- 753 Li, X., Zhou, Z., and Kleiven, S. (2020). An anatomically detailed and personalizable head injury  
754 model: Significance of brain and white matter tract morphological variability on strain.  
755 *Biomechanics and Modeling in Mechanobiology*.
- 756 Liu, Y., Domel, A.G., Yousefsani, S.A., Kondic, J., Grant, G., Zeineh, M., and Camarillo, D.B.  
757 (2020a). Validation and comparison of instrumented mouthguards for measuring head  
758 kinematics and assessing brain deformation in football impacts. *Annals of Biomedical*  
759 *Engineering* 48, 2580-2598.
- 760 Liu, Y., Domel, A.G., Yousefsani, S.A., Kondic, J., Grant, G., Zeineh, M., and Camarillo, D.B.  
761 (2020b). Validation and Comparison of Instrumented Mouthguards for Measuring Head  
762 Kinematics and Assessing Brain Deformation in Football Impacts. *Annals of Biomedical*  
763 *Engineering*, 1-19.
- 764 Maas, A.I., Menon, D.K., Adelson, P.D., Andelic, N., Bell, M.J., Belli, A., Bragge, P., Brazinova,  
765 A., Büki, A., and Chesnut, R.M. (2017). Traumatic brain injury: integrated approaches to  
766 improve prevention, clinical care, and research. *The Lancet Neurology* 16, 987-1048.

- 767 Mao, H., Zhang, L., Jiang, B., Genthikatti, V.V., Jin, X., Zhu, F., Makwana, R., Gill, A., Jandir,  
768 G., and Singh, A. (2013). Development of a finite element human head model partially  
769 validated with thirty five experimental cases. *Journal of biomechanical engineering* 135.
- 770 Maréchal, L. (2009). "Advances in octree-based all-hexahedral mesh generation: handling sharp  
771 features," in *Proceedings of the 18th international meshing roundtable*. Springer), 65-84.
- 772 Maxwell, W., Dhillon, K., Harper, L., Espin, J., Macintosh, T., Smith, D., and Graham, D. (2003).  
773 There is differential loss of pyramidal cells from the human hippocampus with survival  
774 after blunt head injury. *Journal of Neuropathology & Experimental Neurology* 62, 272-  
775 279.
- 776 Mcallister, T.W., Ford, J.C., Ji, S., Beckwith, J.G., Flashman, L.A., Paulsen, K., and Greenwald,  
777 R.M. (2012). Maximum principal strain and strain rate associated with concussion  
778 diagnosis correlates with changes in corpus callosum white matter indices. *Annals of*  
779 *biomedical engineering* 40, 127-140.
- 780 Mckee, A.C., Stein, T.D., Kiernan, P.T., and Alvarez, V.E. (2015). The neuropathology of  
781 chronic traumatic encephalopathy. *Brain pathology* 25, 350-364.
- 782 Meier, T.B., Brummel, B.J., Singh, R., Nerio, C.J., Polanski, D.W., and Bellgowan, P.S. (2015).  
783 The underreporting of self-reported symptoms following sports-related concussion.  
784 *Journal of science and medicine in sport* 18, 507-511.
- 785 Miller, L.E., Urban, J.E., and Stitzel, J.D. (2016). Development and validation of an atlas-based  
786 finite element brain model. *Biomechanics and modeling in mechanobiology* 15, 1201-  
787 1214.
- 788 Mills, B.D., Goubran, M., Parivash, S.N., Dennis, E.L., Rezaii, P., Akers, C., Bian, W., Mitchell,  
789 L.A., Boldt, B., and Douglas, D. (2020). Longitudinal alteration of cortical thickness and  
790 volume in high-impact sports. *NeuroImage*, 116864.
- 791 Ng, T., Graham, D., Adams, J., and Ford, I. (1989). Changes in the hippocampus and the  
792 cerebellum resulting from hypoxic insults: frequency and distribution. *Acta*  
793 *neuropathologica* 78, 438-443.
- 794 Panzer, M.B., Myers, B.S., Capehart, B.P., and Bass, C.R. (2012). Development of a finite  
795 element model for blast brain injury and the effects of CSF cavitation. *Annals of*  
796 *biomedical engineering* 40, 1530-1544.
- 797 Parivash, S.N., Goubran, M., Mills, B.D., Rezaii, P., Thaler, C., Wolman, D., Bian, W., Mitchell,  
798 L.A., Boldt, B., and Douglas, D. (2019). Longitudinal changes in hippocampal subfield  
799 volume associated with collegiate football. *Journal of neurotrauma* 36, 2762-2773.
- 800 Parsons, C., Danysz, W., and Quack, G. (1999). Memantine is a clinically well tolerated N-  
801 methyl-D-aspartate (NMDA) receptor antagonist—a review of preclinical data.  
802 *Neuropharmacology* 38, 735-767.
- 803 Pellman, E.J., Viano, D.C., Tucker, A.M., Casson, I.R., and Waeckerle, J.F. (2003). Concussion  
804 in professional football: reconstruction of game impacts and injuries. *Neurosurgery* 53,  
805 799-814.
- 806 Pieper, S., Halle, M., and Kikinis, R. (Year). "3D Slicer", in: *2004 2nd IEEE international*  
807 *symposium on biomedical imaging: nano to macro (IEEE Cat No. 04EX821)*: IEEE), 632-  
808 635.
- 809 Pulsinelli, W.A. (1985). "Selective neuronal vulnerability: morphological and molecular  
810 characteristics," in *Progress in brain research*. Elsevier), 29-37.
- 811 Roozenbeek, B., Maas, A.I., and Menon, D.K. (2013). Changing patterns in the epidemiology of  
812 traumatic brain injury. *Nature Reviews Neurology* 9, 231-236.
- 813 Rosenthal, J.A., Foraker, R.E., Collins, C.L., and Comstock, R.D. (2014). National high school  
814 athlete concussion rates from 2005-2006 to 2011-2012. *The American journal of sports*  
815 *medicine* 42, 1710-1715.

- 816 Runnerstam, M., Bao, F., Huang, Y., Shi, J., Gutierrez, E., Hamberger, A., Hansson, H.-A.,  
817 Viano, D., and Haglid, K. (2001). A new model for diffuse brain injury by rotational  
818 acceleration: II. Effects on extracellular glutamate, intracranial pressure, and neuronal  
819 apoptosis. *Journal of neurotrauma* 18, 259-273.
- 820 Sanchez, E.J., Gabler, L.F., Good, A.B., Funk, J.R., Crandall, J.R., and Panzer, M.B. (2019). A  
821 reanalysis of football impact reconstructions for head kinematics and finite element  
822 modeling. *Clinical biomechanics* 64, 82-89.
- 823 Seok, J., Warren, H.S., Cuenca, A.G., Mindrinos, M.N., Baker, H.V., Xu, W., Richards, D.R.,  
824 McDonald-Smith, G.P., Gao, H., and Hennessy, L. (2013). Genomic responses in mouse  
825 models poorly mimic human inflammatory diseases. *Proceedings of the National  
826 Academy of Sciences* 110, 3507-3512.
- 827 Singh, R., Meier, T.B., Kuplicki, R., Savitz, J., Mukai, I., Cavanagh, L., Allen, T., Teague, T.K.,  
828 Nerio, C., and Polanski, D. (2014). Relationship of collegiate football experience and  
829 concussion with hippocampal volume and cognitive outcomes. *Jama* 311, 1883-1888.
- 830 Smith, D.H., Chen, X.-H., Xu, B.-N., Mcintosh, T.K., Gennarelli, T.A., and Meaney, D.E. (1997).  
831 Characterization of diffuse axonal pathology and selective hippocampal damage following  
832 inertial brain trauma in the pig. *Journal of Neuropathology & Experimental Neurology* 56,  
833 822-834.
- 834 Souli, M.H., Ouahsine, A., and Lewin, L. (2000). ALE formulation for fluid–structure interaction  
835 problems. *Computer methods in applied mechanics and engineering* 190, 659-675.
- 836 Takhounts, E.G., Ridella, S.A., Hasija, V., Tannous, R.E., Campbell, J.Q., Malone, D., Danelson,  
837 K., Stitzel, J., Rowson, S., and Duma, S. (2008). Investigation of traumatic brain injuries  
838 using the next generation of simulated injury monitor (SIMon) finite element head model.  
839 *Stapp Car Crash Journal* 52, 1-31.
- 840 Trotta, A., Clark, J.M., Mcgoldrick, A., Gilchrist, M.D., and Annaidh, A.N. (2020). Biofidelic  
841 finite element modelling of brain trauma: Importance of the scalp in simulating head  
842 impact. *International Journal of Mechanical Sciences* 173, 105448.
- 843 van Leer, B. (1979). Towards the ultimate conservative difference scheme. V. A second-order  
844 sequel to Godunov's method. *Journal of computational Physics* 32, 101-136.
- 845 Van Noort, R., Black, M., Martin, T., and Meanley, S. (1981). A study of the uniaxial mechanical  
846 properties of human dura mater preserved in glycerol. *Biomaterials* 2, 41-45.
- 847 Van Petten, C. (2004). Relationship between hippocampal volume and memory ability in healthy  
848 individuals across the lifespan: review and meta-analysis. *Neuropsychologia* 42, 1394-  
849 1413.
- 850 Viano, D.C., Casson, I.R., Pellman, E.J., Zhang, L., King, A.I., and Yang, K.H. (2005).  
851 Concussion in professional football: brain responses by finite element analysis: part 9.  
852 *Neurosurgery* 57, 891-916.
- 853 Wisse, L.E., Biessels, G.J., and Geerlings, M.I. (2014). A critical appraisal of the hippocampal  
854 subfield segmentation package in FreeSurfer. *Frontiers in aging neuroscience* 6, 261.
- 855 Wisse, L.E., Chételat, G., Daugherty, A.M., De Flores, R., La Joie, R., Mueller, S.G., Stark, C.E.,  
856 Wang, L., Yushkevich, P.A., and Berron, D. (2021). Hippocampal subfield volumetry  
857 from structural isotropic 1 mm<sup>3</sup> MRI scans: A note of caution. *Human brain mapping* 42,  
858 539-550.
- 859 Wolf, J.A., Johnson, B.N., Johnson, V.E., Putt, M.E., Browne, K.D., Mietus, C.J., Brown, D.P.,  
860 Wofford, K.L., Smith, D.H., and Grady, M.S. (2017). Concussion induces hippocampal  
861 circuitry disruption in swine. *Journal of neurotrauma* 34, 2303-2314.
- 862 Yushkevich, P.A., Amaral, R.S., Augustinack, J.C., Bender, A.R., Bernstein, J.D., Boccardi, M.,  
863 Bocchetta, M., Burggren, A.C., Carr, V.A., and Chakravarty, M.M. (2015). Quantitative  
864 comparison of 21 protocols for labeling hippocampal subfields and parahippocampal

- 865 subregions in in vivo MRI: towards a harmonized segmentation protocol. *Neuroimage*  
866 111, 526-541.
- 867 Zhao, W., Cai, Y., Li, Z., and Ji, S. (2017). Injury prediction and vulnerability assessment using  
868 strain and susceptibility measures of the deep white matter. *Biomechanics and modeling in*  
869 *mechanobiology* 16, 1709-1727.
- 870 Zhao, W., and Ji, S. (2019). Mesh convergence behavior and the effect of element integration of a  
871 human head injury model. *Annals of biomedical engineering* 47, 475-486.
- 872 Zhou, Z. (2019). *Evaluation of Fluid-Structure Interaction and Biofidelity of Finite Element Head*  
873 *Models*. Doctor, KTH Royal Institute of Technology.
- 874 Zhou, Z., Domel, A.G., Li, X., Grant, G., Kleiven, S., Camarillo, D., and Zeineh, M. (2021a).  
875 White matter tract-oriented deformation is dependent on real-time axonal fiber orientation.  
876 *Journal of neurotrauma* 38, 1730-1745.
- 877 Zhou, Z., Jiang, B., Cao, L., Zhu, F., Mao, H., and Yang, K.H. (2016). Numerical simulations of  
878 the 10-year-old head response in drop impacts and compression tests. *computer methods*  
879 *and programs in biomedicine* 131, 13-25.
- 880 Zhou, Z., Li, X., and Kleiven, S. (2019a). Biomechanics of acute subdural hematoma in the  
881 elderly: A fluid-structure interaction study. *Journal of neurotrauma* 36, 2099-2108.
- 882 Zhou, Z., Li, X., and Kleiven, S. (2019b). Fluid–structure interaction simulation of the brain–skull  
883 interface for acute subdural haematoma prediction. *Biomechanics and modeling in*  
884 *mechanobiology* 18, 155-173.
- 885 Zhou, Z., Li, X., and Kleiven, S. (2020a). Biomechanics of periventricular injury. *Journal of*  
886 *neurotrauma* 37, 1074-1090.
- 887 Zhou, Z., Li, X., and Kleiven, S. (2020b). Evaluation of brain-skull interface modelling  
888 approaches on the prediction of acute subdural hematoma in the elderly. *Journal of*  
889 *biomechanics* 105, 109787.
- 890 Zhou, Z., Li, X., Kleiven, S., and Hardy, W. (2019c). Brain Strain from Motion of Sparse  
891 Markers. *Stapp car Crash Journal* 63, 1-27.
- 892 Zhou, Z., Li, X., Liu, Y., Fahlstedt, M., Georgiadis, M., Zhan, X., Raymond, S.J., Grant, G.,  
893 Kleiven, S., and Camarillo, D. (2021b). Towards a comprehensive delineation of white  
894 matter tract-related deformation. *Journal of neurotrauma*, ahead of print.  
895 <http://doi.org/10.1089/neu.2021.0195>.
- 896

## 897 **Appendix A: Development of finite element head model without the temporal horn**

898 The finite element (FE) head model without the temporal horn (i.e., the no-temporal-horn  
899 (NTH)-Model) used in this study was previously established at KTH Royal Institute of Technology  
900 in Stockholm, Sweden (Zhou et al., 2020a). The geometry of the head model was extracted from  
901 an averaged magnetic resonance imaging (MRI) head template database (Fillmore et al., 2015).  
902 High-resolution T1- and T2-weighted images were segmented using the Freesurfer 7 (Fischl, 2012).  
903 The segmentation was subsequently processed by the 3D Slicer (Pieper et al., 2004) to obtain the  
904 surfaces of the skull, the brain, the third and the lateral ventricles, with the temporal horn being  
905 disregarded. All surfaces then served as an input to the Hexotic software, generating all hexahedron

906 elements based on an octree algorithm (Maréchal, 2009). The falx and tentorium, which were  
 907 almost invisible in the MRI, were manually created as shell elements based on the anatomical  
 908 illustrations, while the pia mater and dura mater were generated by finding the outer faces of brain  
 909 elements and subarachnoid cerebrospinal fluid (CSF) elements, respectively.

910 The material representation of simulated head components is summarized in Table A1 and  
 911 Table A2. For the brain, a second-order Ogden-based hyperelastic constitutive law was used to  
 912 describe the nonlinear behavior of the brain tissue, with additional linear viscoelastic terms to  
 913 account for rate dependence. The subarachnoid CSF was modeled as a nearly incompressible  
 914 material and shared interfacial nodes with the brain and skull. Mechanical properties of the  
 915 intracranial membrane (i.e., pia mater and falx/tentorium/dura mater) were determined from the  
 916 averaged material stress-strain curves from the tissue experiments. The brain, subarachnoid CSF,  
 917 and intracranial membranes were modeled as Lagrangian elements (Zhou et al., 2020a). In  
 918 particular, the ventricles were represented by arbitrary Lagrange-Eulerian (ALE) fluid elements,  
 919 and their responses were coupled to the brain via a fluid-structure interaction (FSI) scheme, which  
 920 is detailed in the “Cerebral ventricle modeling” and “Brain-ventricle interface modeling” sections  
 921 of the current study. Note that, in the NTH-model, the temporal horn was substituted as brain  
 922 parenchyma with the material constants in Table A2.

923 **Table A1. Material properties for the finite element head model.** K is Bulk modulus and N/A  
 924 is not applicable.

| Tissue              | Young's modulus (MPa)         | Density (kg/dm <sup>3</sup> ) | Poisson's ratio | Reference                  |
|---------------------|-------------------------------|-------------------------------|-----------------|----------------------------|
| Cortical bone       | 15000                         | 2.00                          | 0.22            | (Kleiven, 2007)            |
| Porous bone         | 1000                          | 1.3                           | 0.24            | (Kleiven, 2007)            |
| Brain               | Hyper-Viscoelastic (Table A2) | 1.04                          | 0.5             | (Kleiven, 2007)            |
| CSF/Ventricle       | K = 2.1 GPa                   | 1.00                          | N/A             | (Kleiven, 2007)            |
| Dura/Falx/Tentorium | Average stress-strain curve   | 1.13                          | N/A             | (Aimedieu and Grebe, 2004) |
| Pia                 | Average stress-strain curve   | 1.13                          | N/A             | (Van Noort et al., 1981)   |

925 **Table A2. Ogden hyperelastic and liner viscoelastic constants for the brain material modeling.**  
926  $\mu_i$  and  $\alpha_i$  are Ogden parameters,  $G_i$  represents the 6 shear relaxation moduli,  $\beta_i$  are the 6 decay  
927 constants.

| Parameter    | Value  | Parameter                    | Value           |
|--------------|--------|------------------------------|-----------------|
| $\mu_1$ (Pa) | 53.8   | $\alpha_1$                   | 10.1            |
| $\mu_2$ (Pa) | -120.4 | $\alpha_2$                   | -12.9           |
| $G_1$ (MPa)  | 0.32   | $\beta_1$ (s <sup>-1</sup> ) | 10 <sup>6</sup> |
| $G_2$ (kPa)  | 78     | $\beta_2$ (s <sup>-1</sup> ) | 10 <sup>5</sup> |
| $G_3$ (kPa)  | 6.2    | $\beta_3$ (s <sup>-1</sup> ) | 10 <sup>4</sup> |
| $G_4$ (kPa)  | 8.0    | $\beta_4$ (s <sup>-1</sup> ) | 10 <sup>3</sup> |
| $G_5$ (kPa)  | 1.0    | $\beta_5$ (s <sup>-1</sup> ) | 10 <sup>2</sup> |
| $G_6$ (kPa)  | 3.0    | $\beta_6$ (s <sup>-1</sup> ) | 10 <sup>1</sup> |

## 928 **Appendix B: Validation of brain-skull relative motion and brain strain**

929 The strain response and brain-skull relative motion estimated by the model with the  
930 temporal horn (i.e., the TH-Model) was validated against the available experimental data presented  
931 by Hardy et al. (2007) and Zhou et al. (2019c). In Hardy et al. (2007), a high-speed, biplane X-ray  
932 system was used to track the motion of the radiopaque neutral density targets (NDTs) implanted in  
933 cluster array within the cadaveric brain. The NDT initial coordinates and motion were obtained  
934 with respect to an anatomical coordinate system with the c.g. of the head being the origin. Strain in  
935 the volume encompassed by the NDT cluster was calculated by imposing the experimentally  
936 measured NDT motions to an auxiliary model that was developed by connecting each NDT to its  
937 neighboring counterparts to form tetra elements (Zhou et al., 2019c).

938 In the present work, three representative cases are selected, including C288-T3 (sagittal  
939 impact), C380-T1 (coronal impact), and C380-T2 (horizontal impact). To numerically reproduce  
940 the experimental impacts, the recorded head kinematic curves were imposed to the node which  
941 locates at the center of gravity of the corresponding cadaveric head and is rigidly attached to the  
942 skull. To approximate the specimen anthropometry, the model was scaled independently in  
943 directions of both the depth and breadth to match the reported cadaveric head sizes. The node  
944 nearest to the start position of an experimental NDT target was taken as the marker location in the  
945 model. Motions of the identified nodes with respect to the skull along three anatomical coordinate  
946 directions are obtained from the whole head model simulation with the detailed results presented in

947 **Fig. B1-B3.** Following the procedures established by Zhou et al. (2019c), the initial positions of the  
948 identified nodes and the nodal motion responses predicted in the model was used to calculate the  
949 strain responses, specifically first principal Green-Lagrange strain and shear Green-Lagrange strain,  
950 of the brain model. The strain validation results are shown in **Fig. B4.**

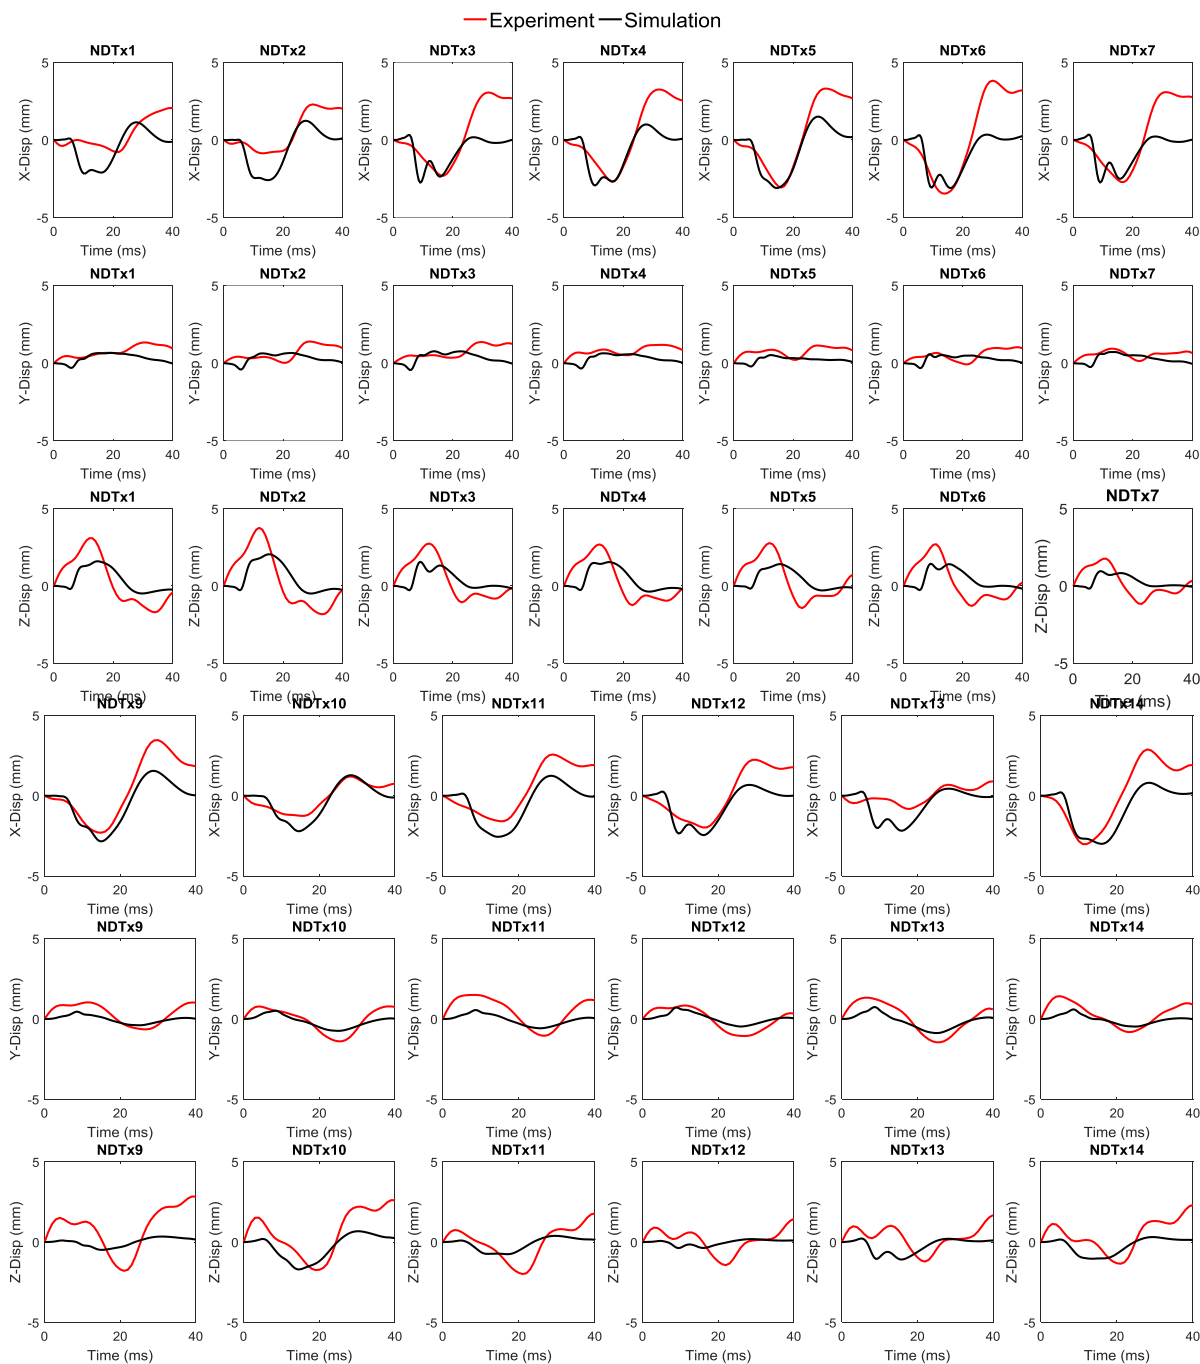

951 **Fig B1.** Comparison between experimental and simulated brain-skull relative motion for the  
952 experiment C288-T3.  
953

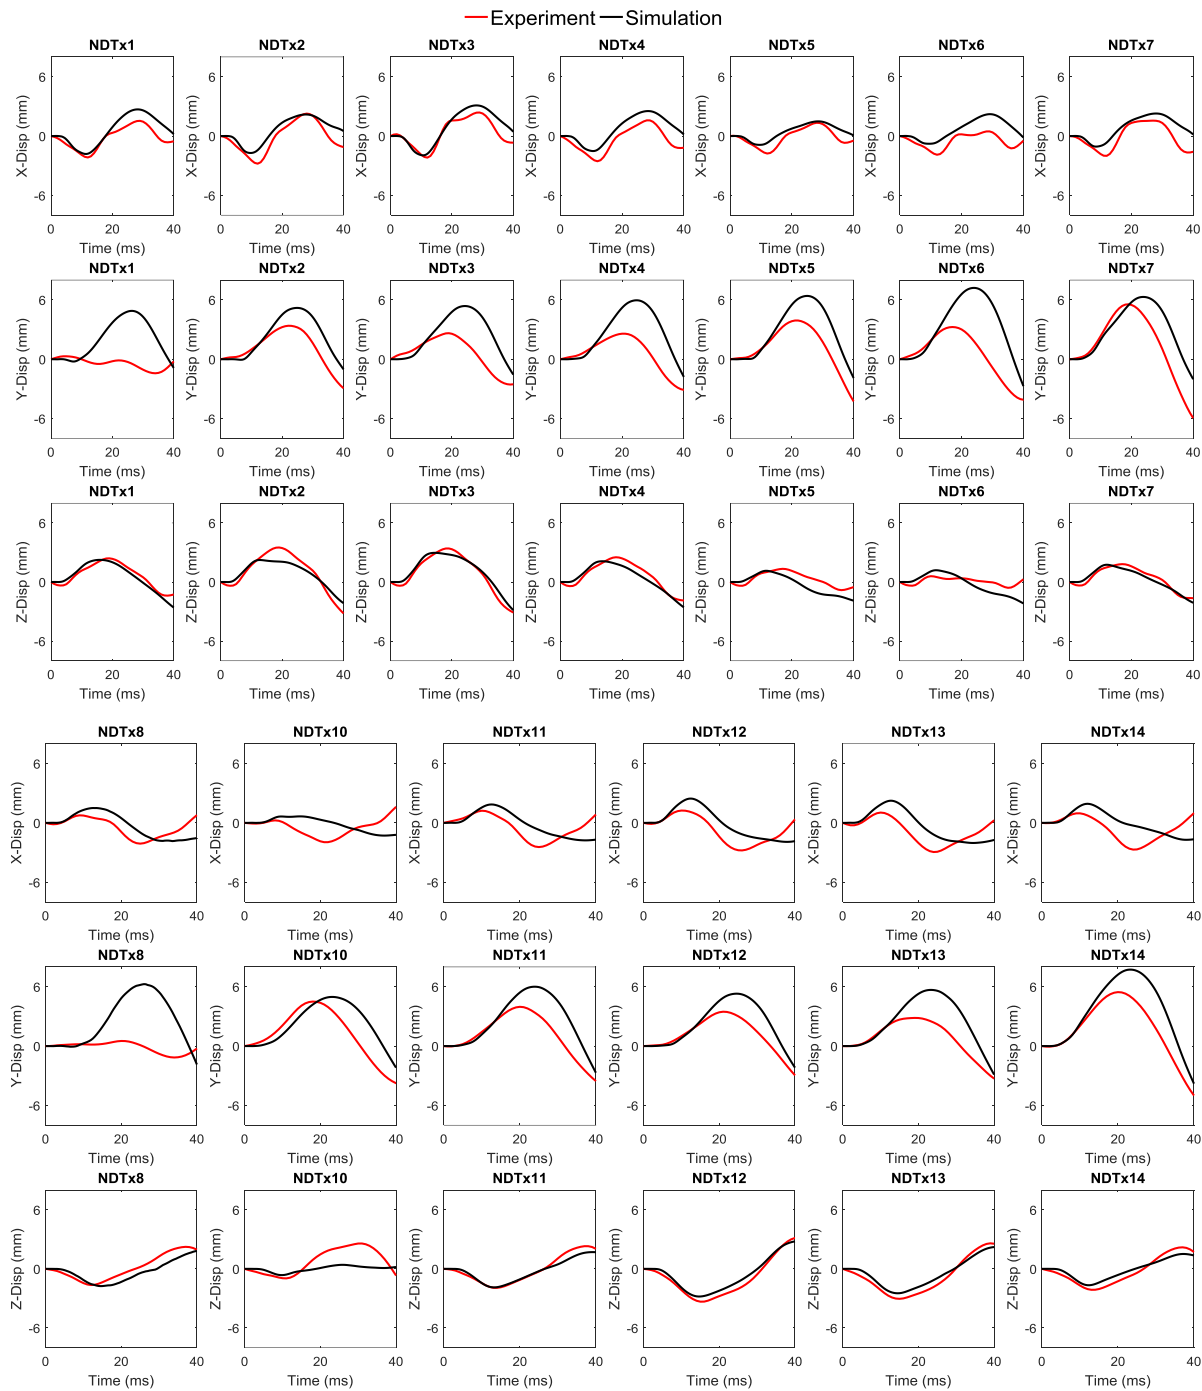

954 **Fig B1. Comparison between experimental and simulated brain-skull relative motion for the**  
955 **experiment C380-T1.**  
956



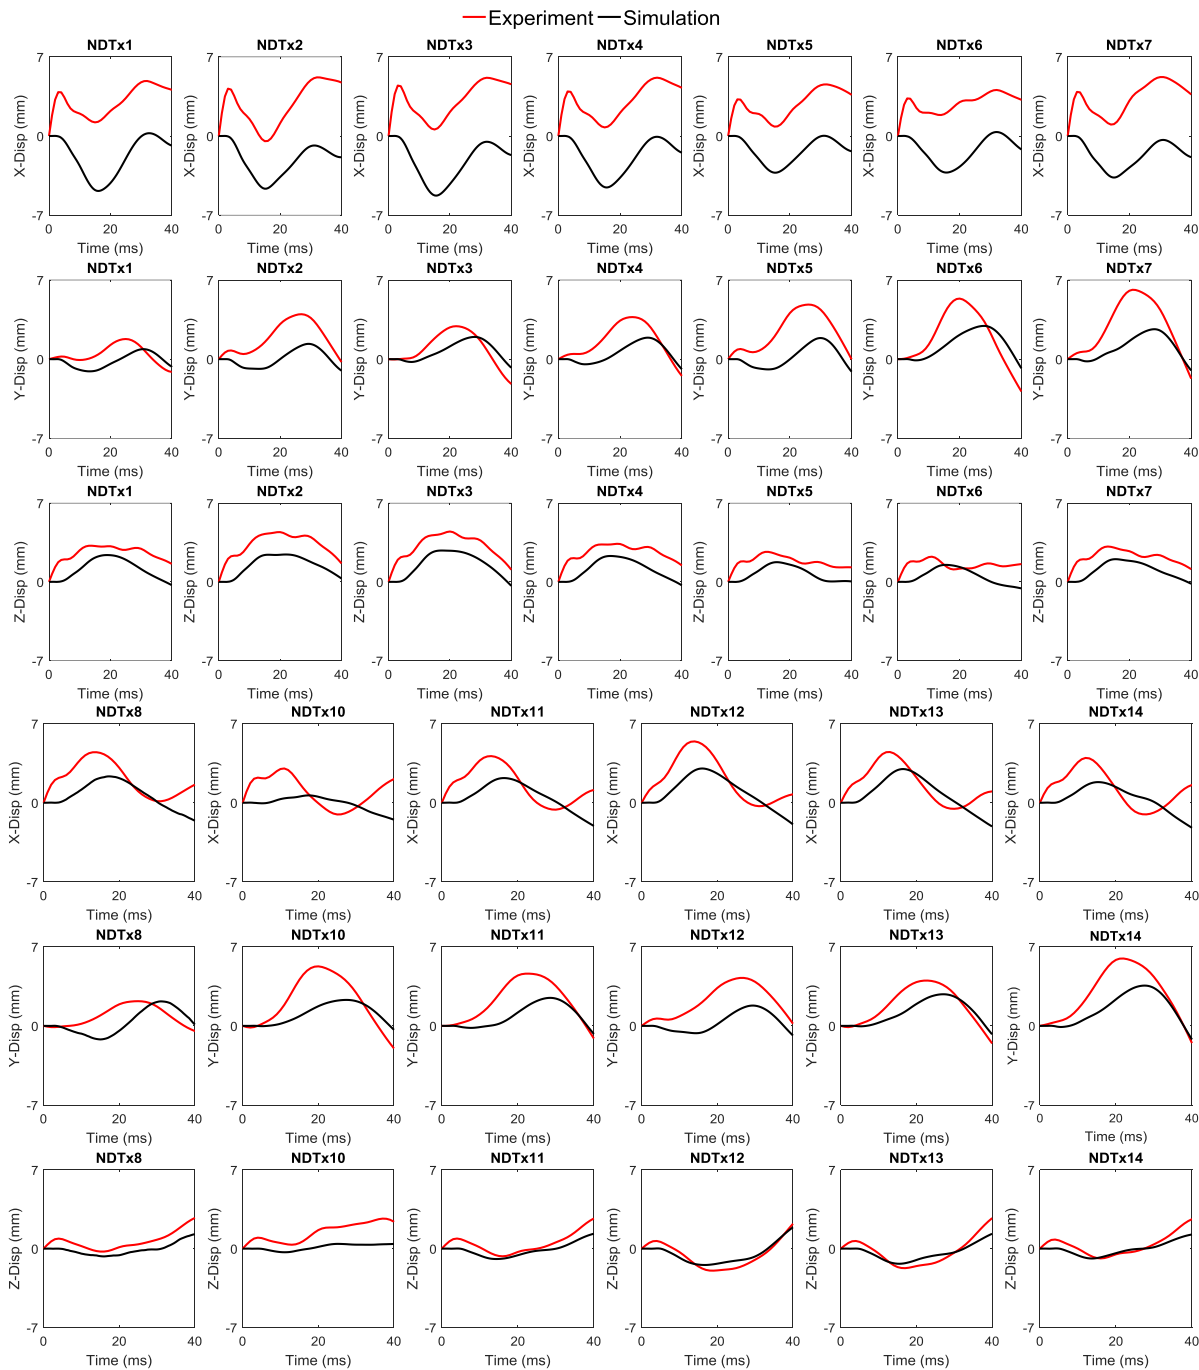

957  
958 **Fig B3. Comparison between experimental and simulated brain-skull relative motion for the**  
959 **experiment C380-T2.**

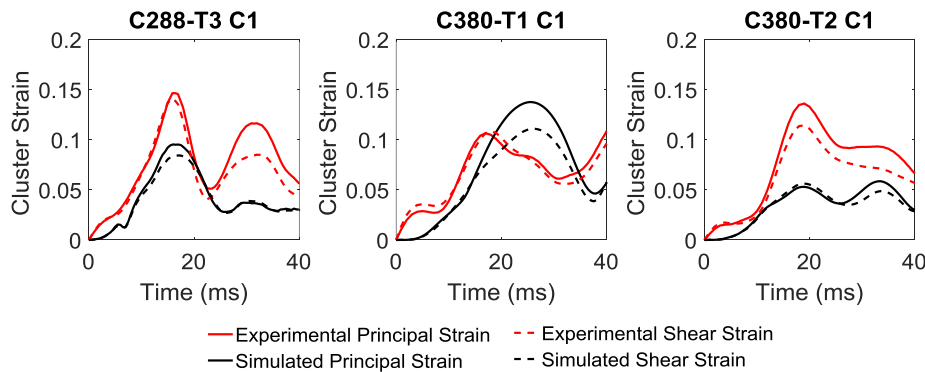

957  
958  
959

960

961 **Fig B4. Comparison between experimental and simulated brain strains.**

962 **Appendix C: Loading curves for 3 concussive impacts and 3 sub-concussive impacts**

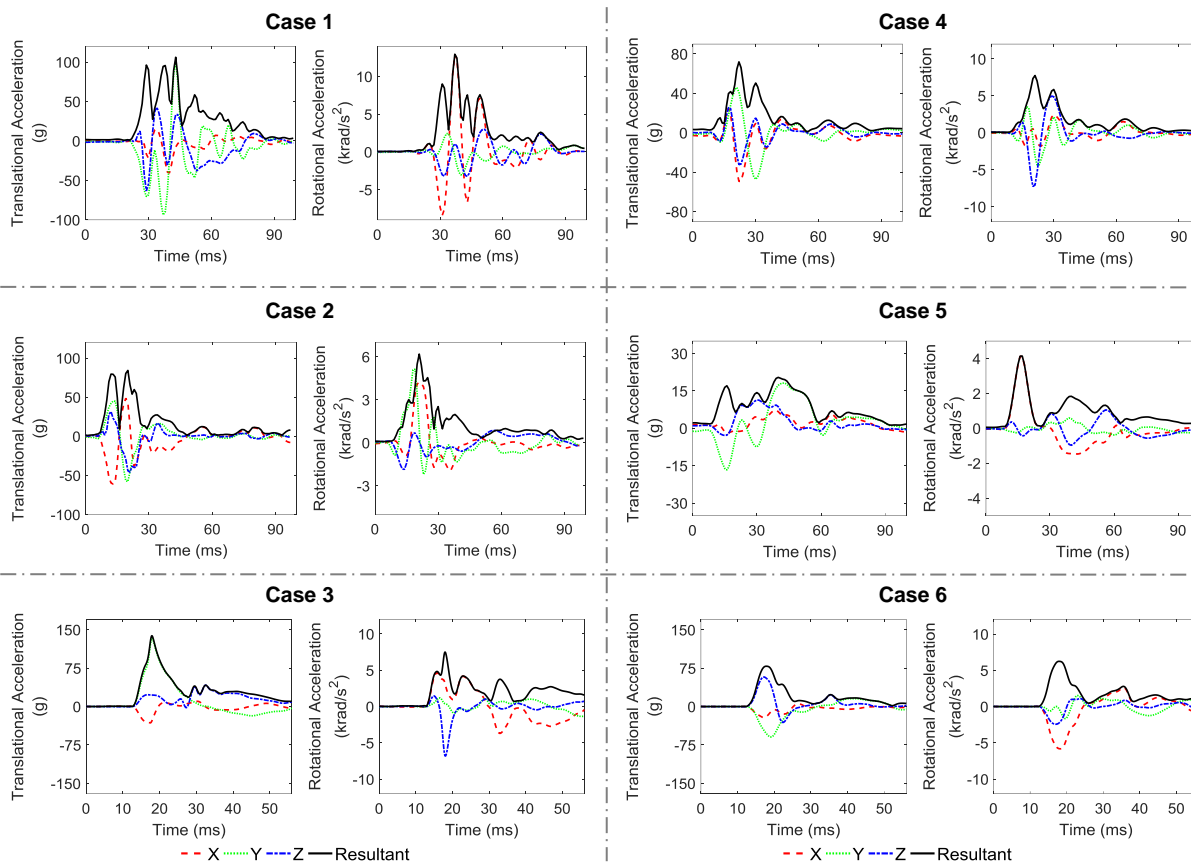

963 **Fig C1. Loading conditions for 3 concussive impacts (Cases 1-3) and 3 sub-concussive impacts**  
964 **(Cases 4-6).** The X, Y, and Z axes are the same as those in the skull-fixed coordinate system in Fig.  
965 1a.  
966

967 **Appendix D: Volume ratio of the hippocampal subfields and whole hippocampus with strain**  
968 **over 0.2 and strain rate over 30 s<sup>-1</sup>**

## Hippocampus

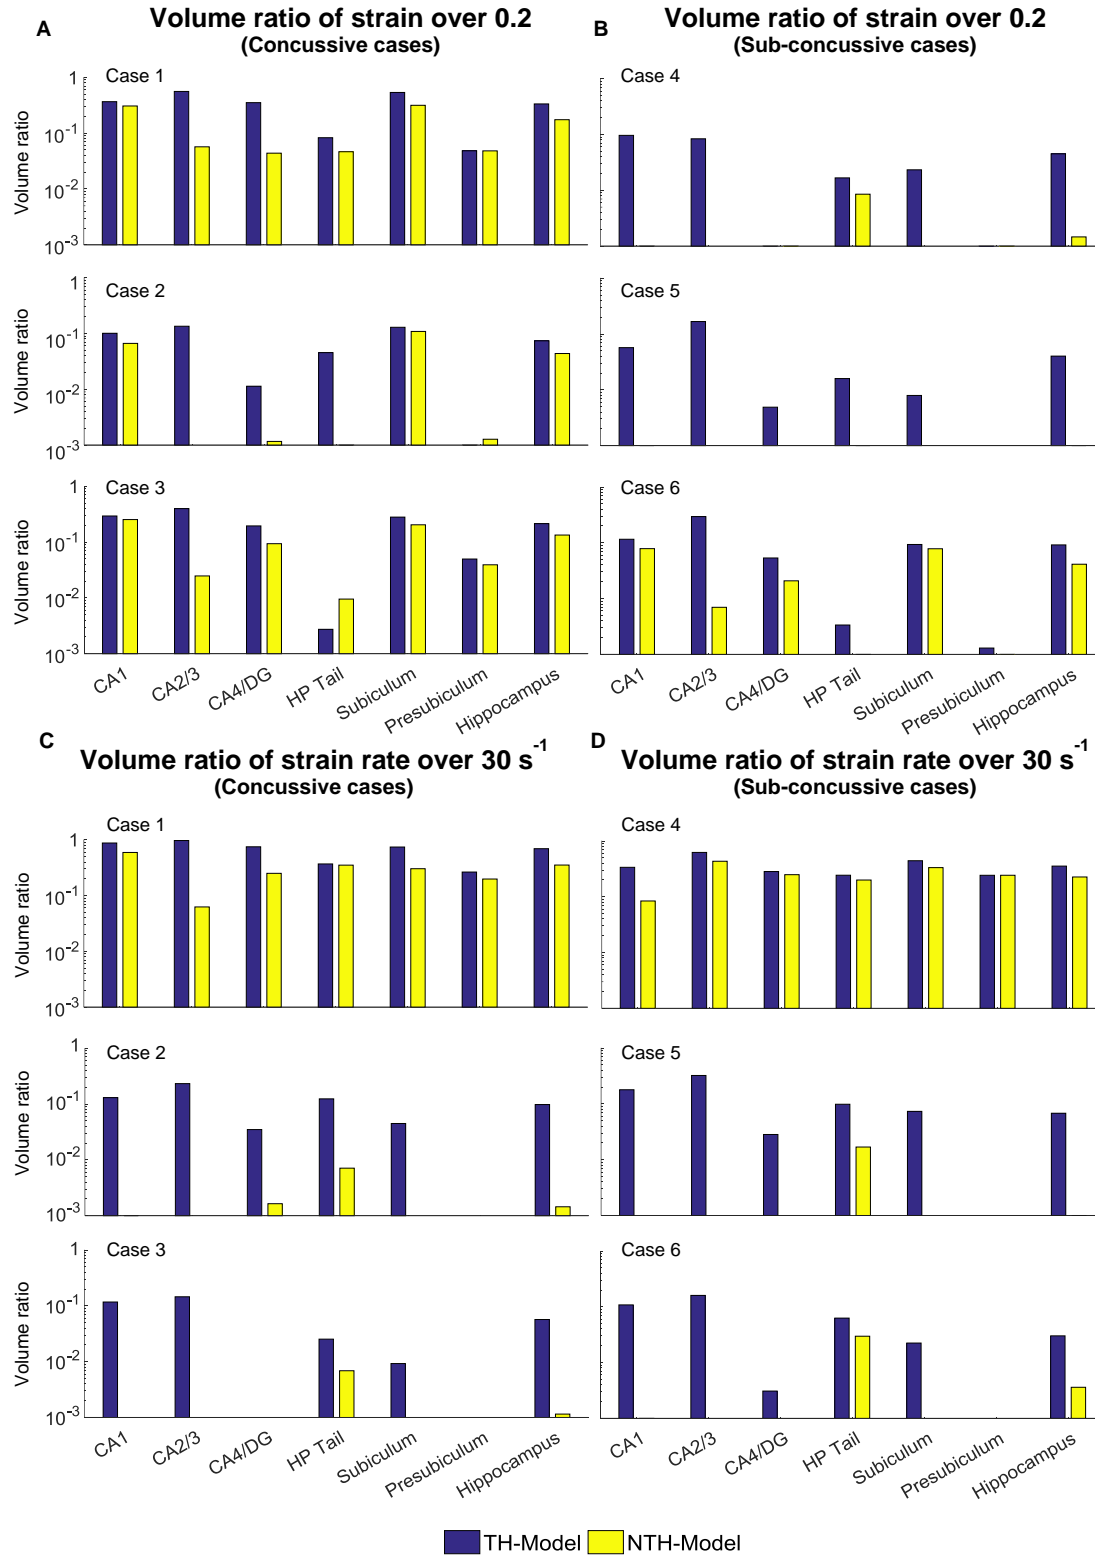

**Fig. D1. Volume ratio of the maximum principle strain over 0.2 and strain rate over  $30 \text{ s}^{-1}$  in the hippocampal subfields and the whole hippocampus between the TH-Model and NTH-model of 3 concussive impacts (Cases 1-3) and 3 sub-concussive impacts (Cases 4-6).**

## Appendix E: Comparison of strain and strain rate in the non-hippocampal regions

## Non-hippocampal regions

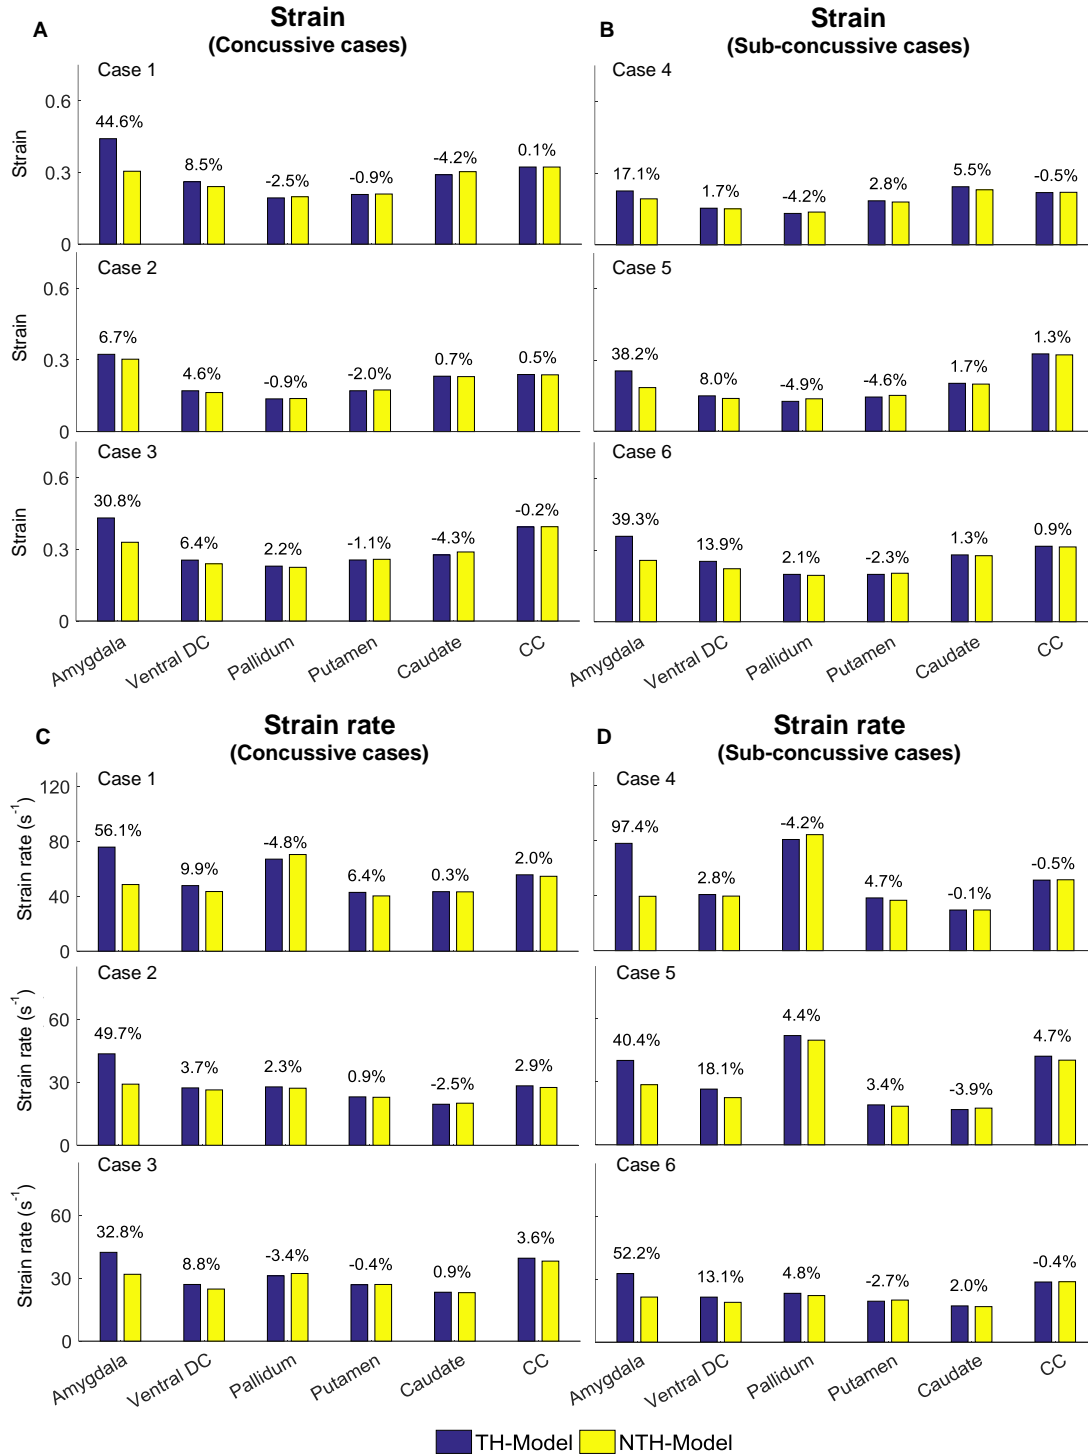

**Fig E1. Comparison of strain and strain rate in the non-hippocampal regions between the TH-model and NTH-model of 3 concussive impacts (Cases 1-3) and 3 sub-concussive impacts (Cases 4-6).** (A) Comparison of strain in the non-hippocampal periventricular regions of 3 concussive impacts. (B) Comparison of strain in the non-hippocampal periventricular regions of 3 sub-concussive impacts. (C) Comparison of strain rate in the non-hippocampal periventricular regions of 3 concussive impacts. (D) Comparison of strain rate in the non-hippocampal periventricular regions of 3 sub-concussive impacts. Percentages in strain difference and strain rate difference are calculated with the results of the NTH-model as the baseline. Ventral DC: ventral diencephalon; CC: Corpus callosum.
